# Supplementary material
Source: PubMed Central journal article supplement (PMC4317264)
Supplement: NIHMS656958-supplement-supplementary_figures_and_methods.pdf [file NIHMS656958-supplement-supplementary_figures_and_methods.pdf]

# Supplemental Figure 1

AP (Aug 2012)

AM (April 2012)

BG (April 2012)

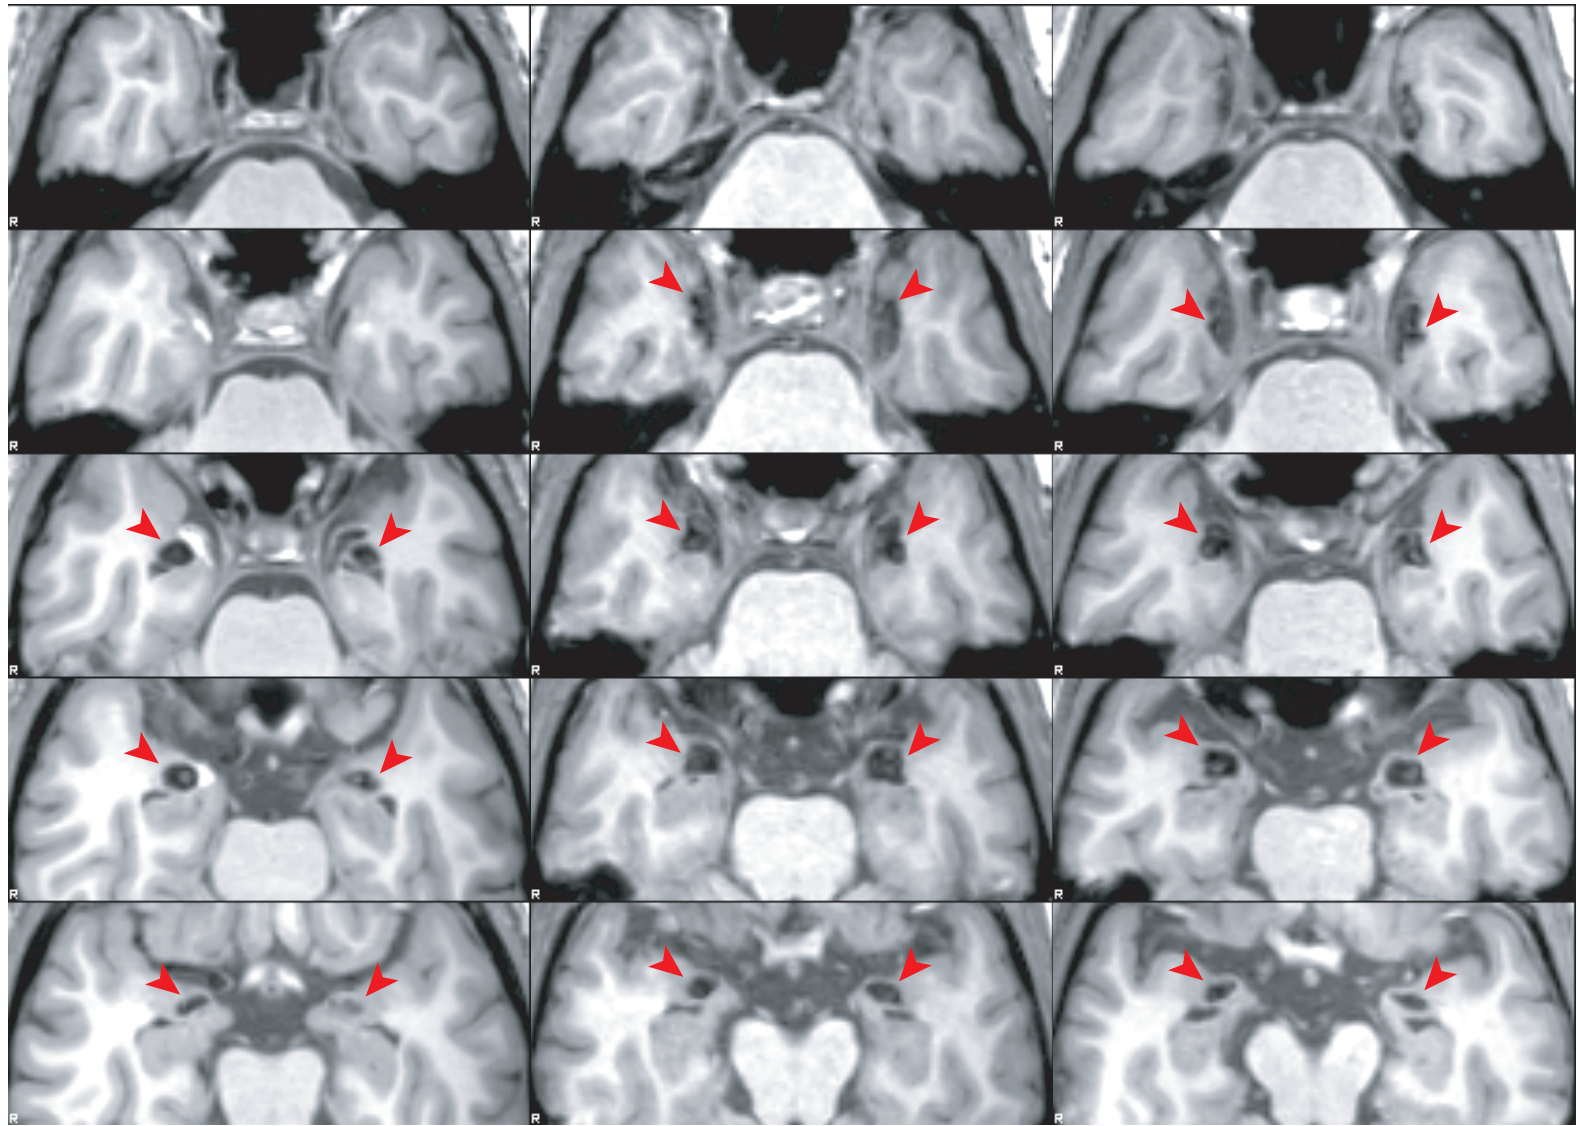

## Supplemental Figure 2

**A**

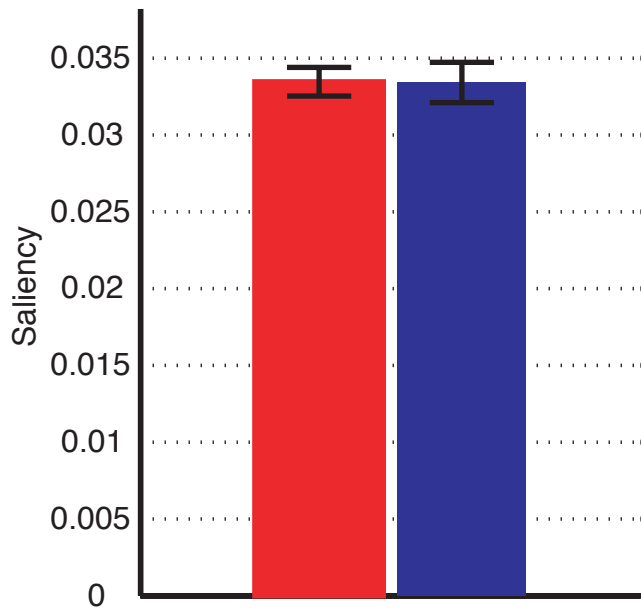

**B**

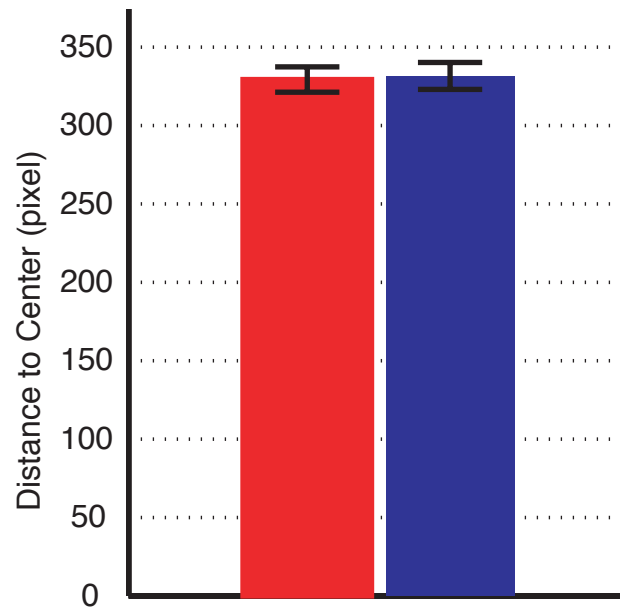

**C**

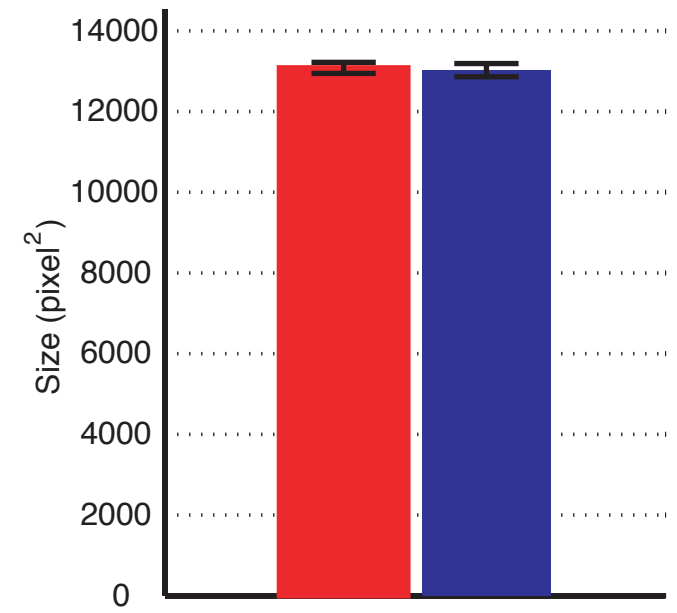

**D**

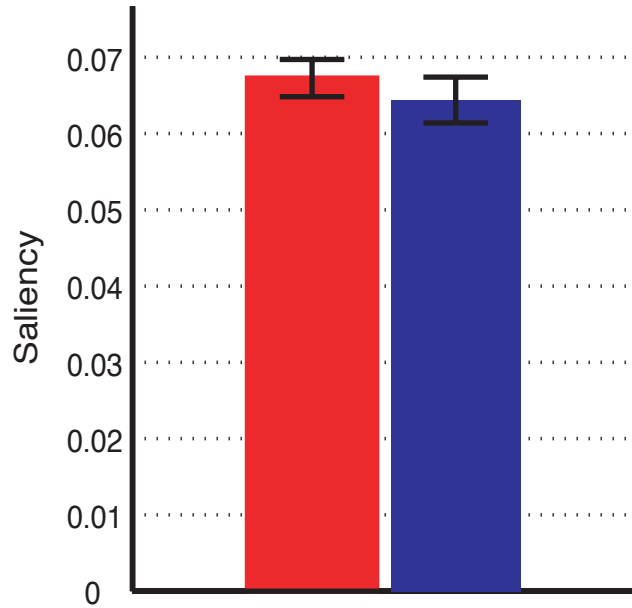

**E**

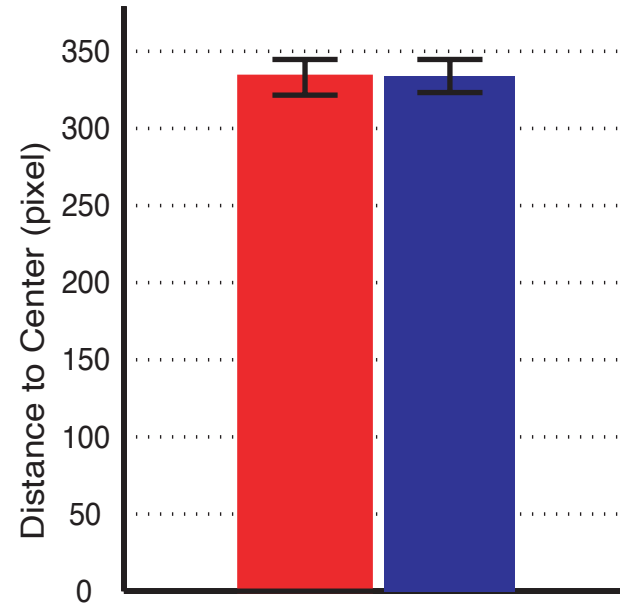

**F**

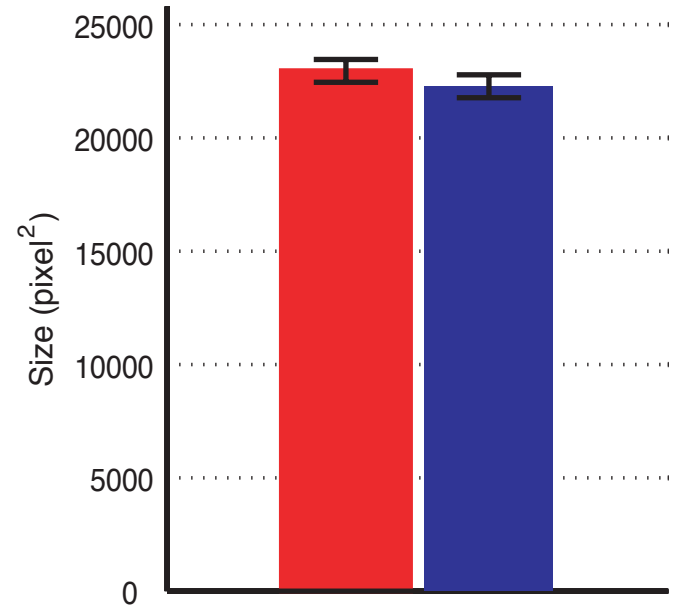

 Social Items

 Non-social Items

# Supplemental Figure 3

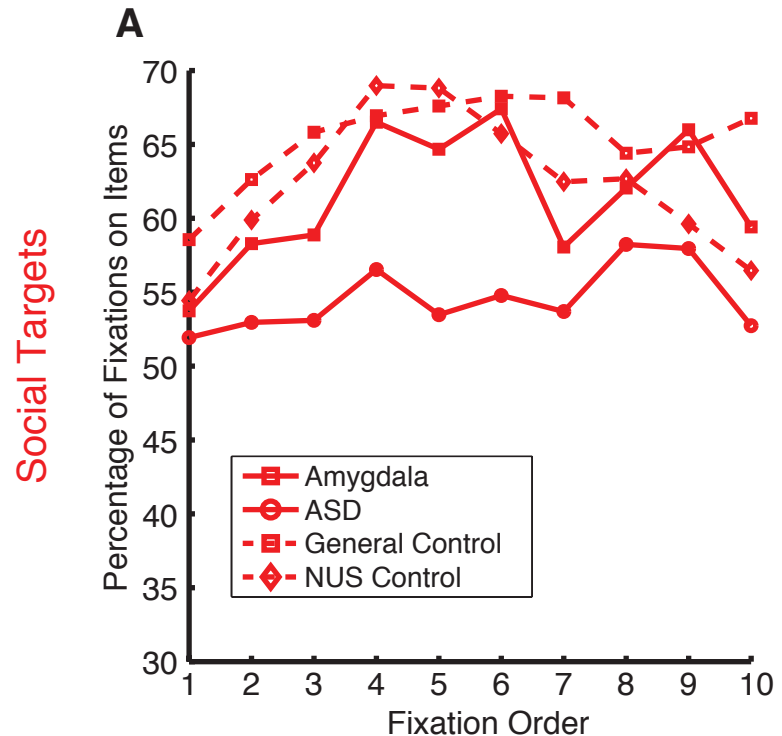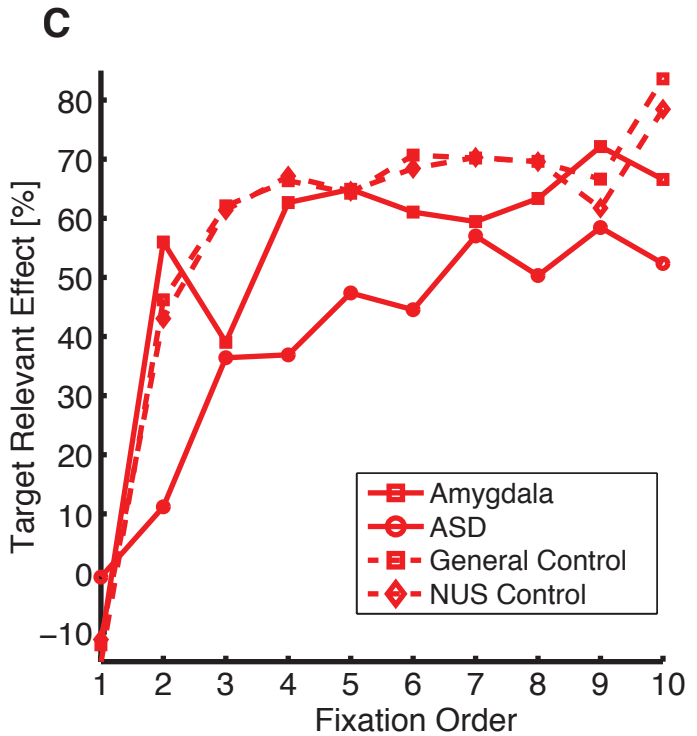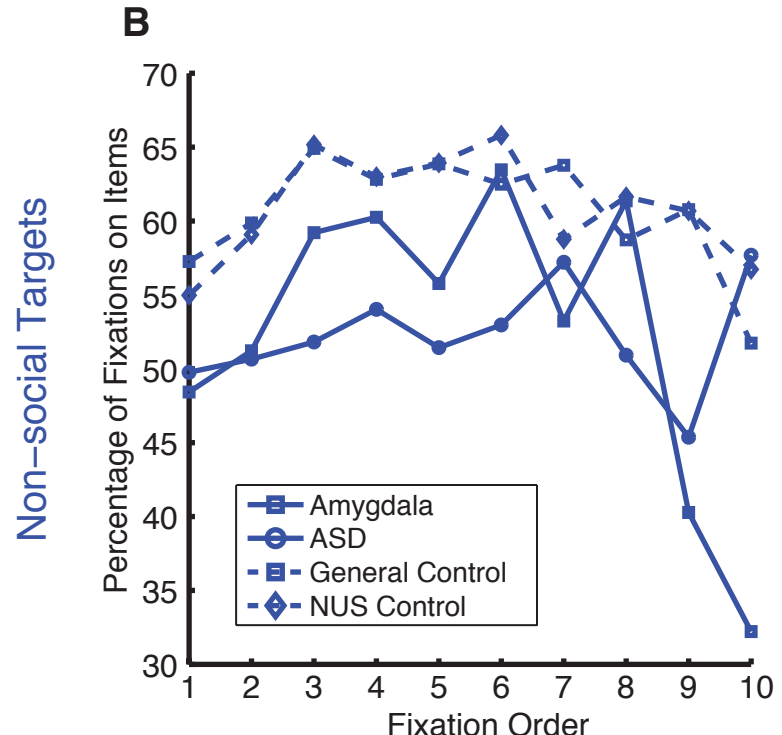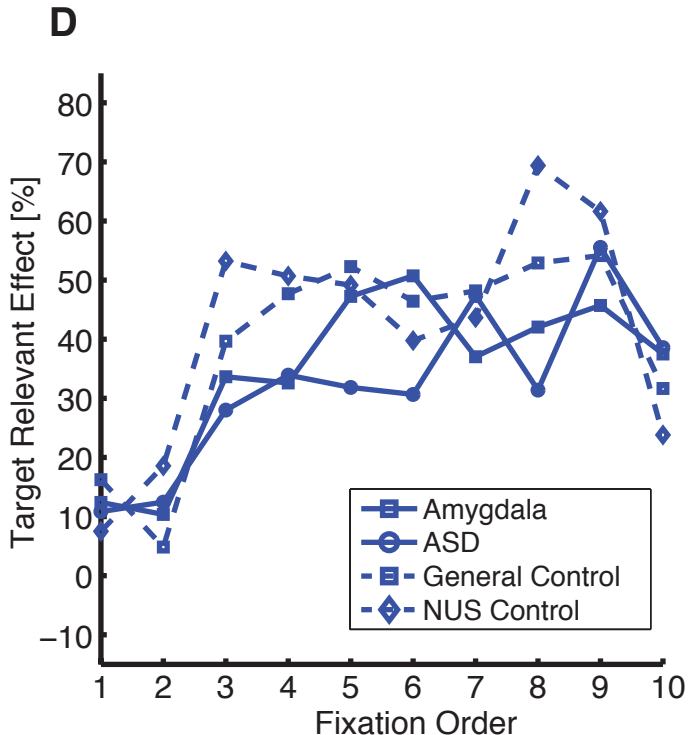

# Supplemental Figure 4

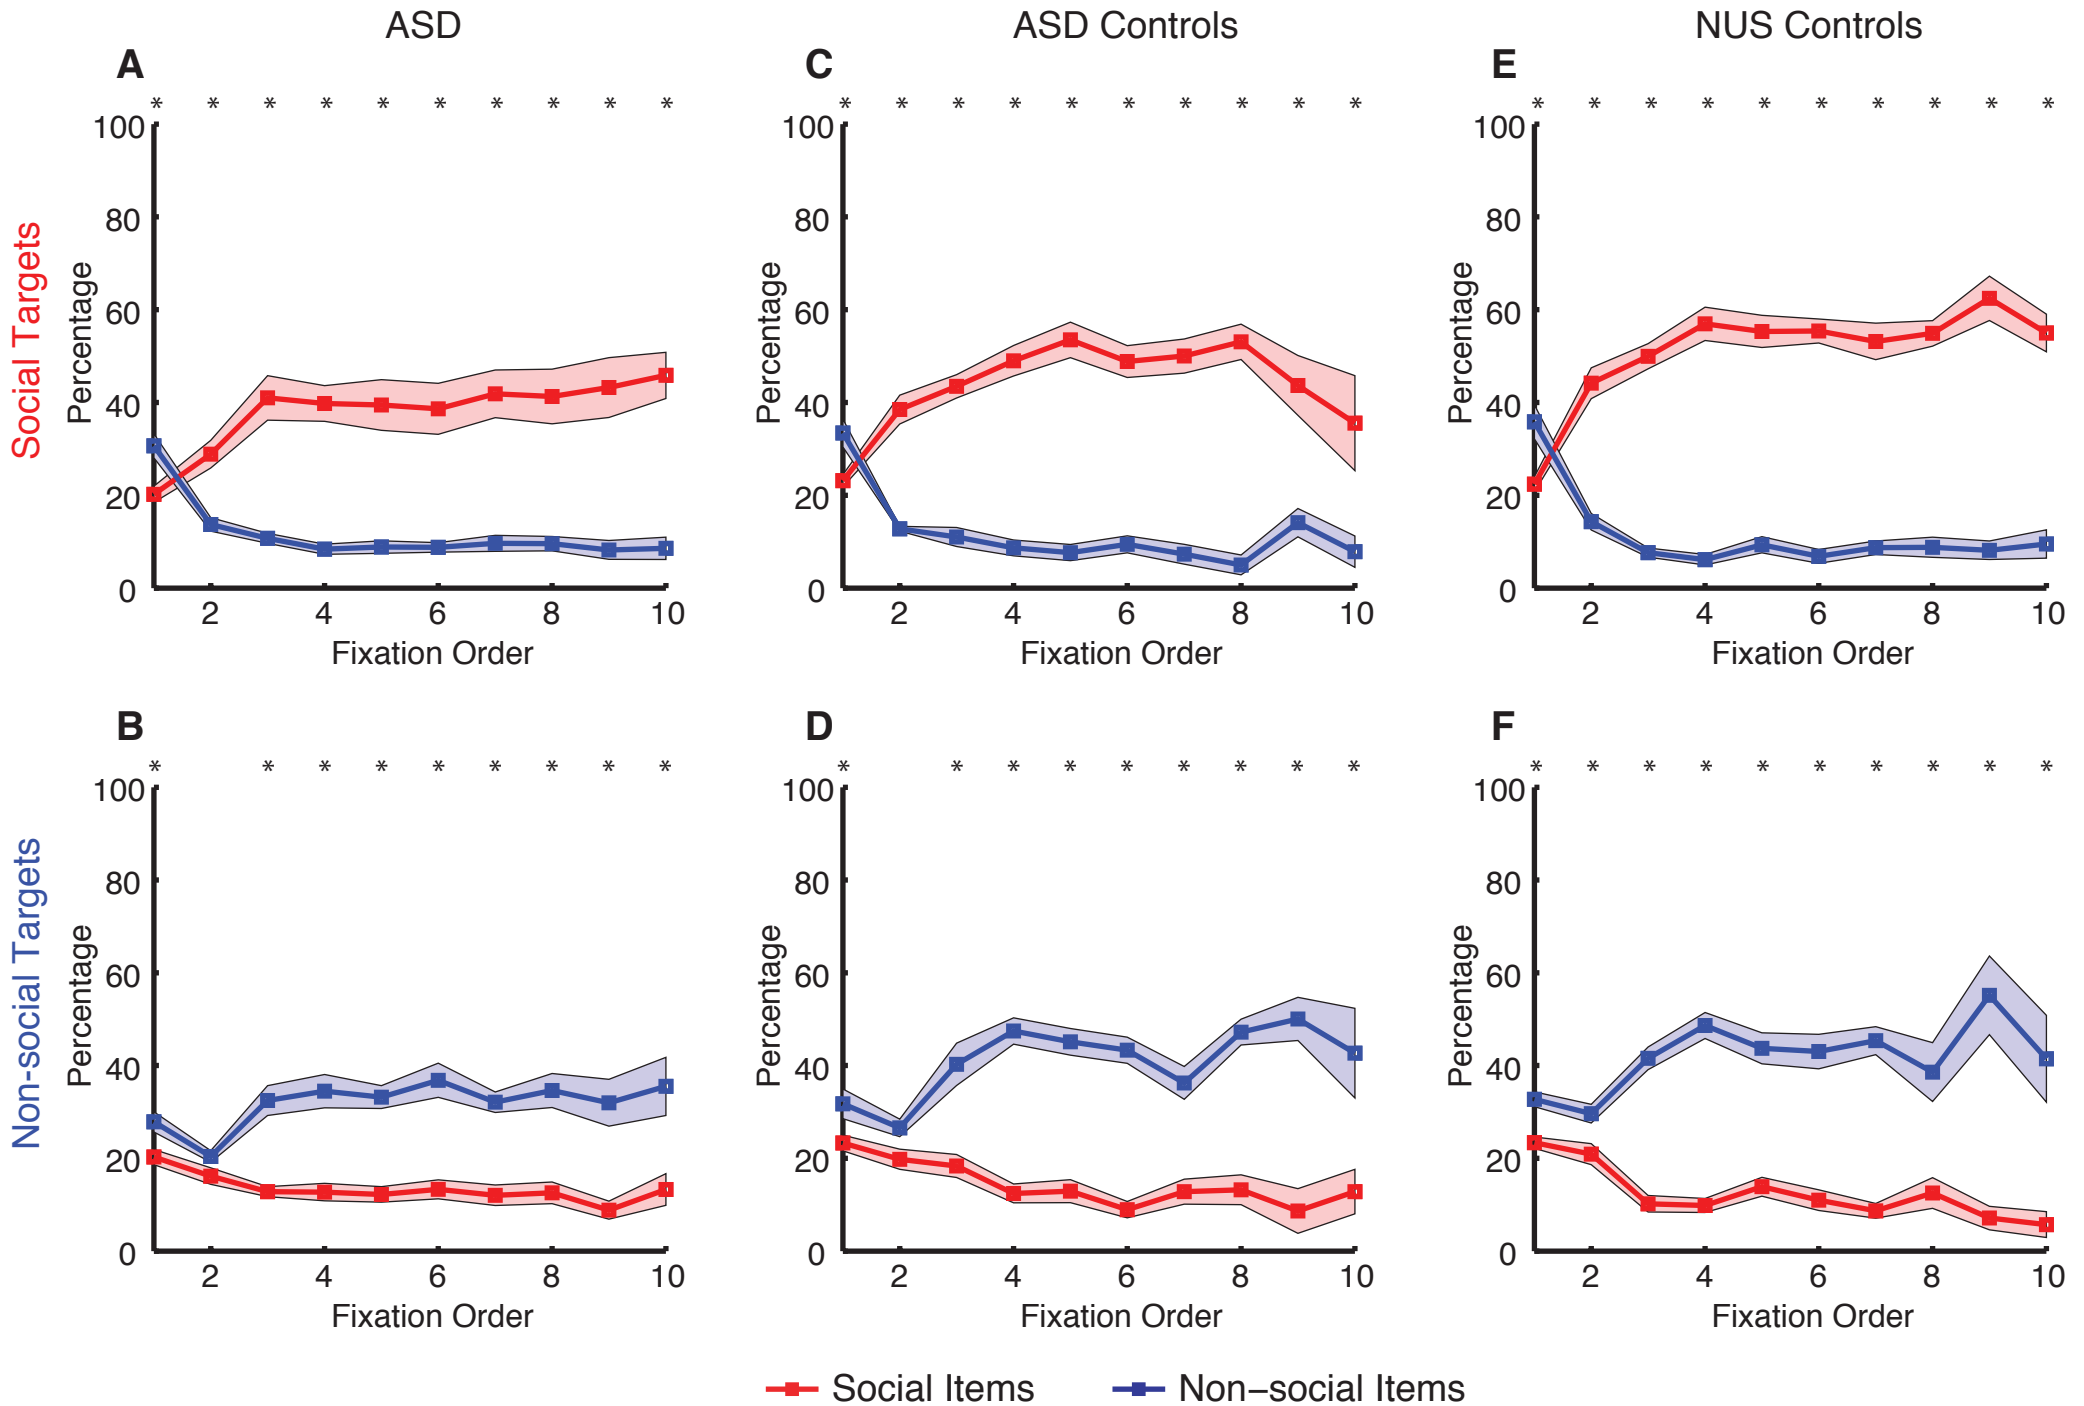

# Supplemental Figure 5

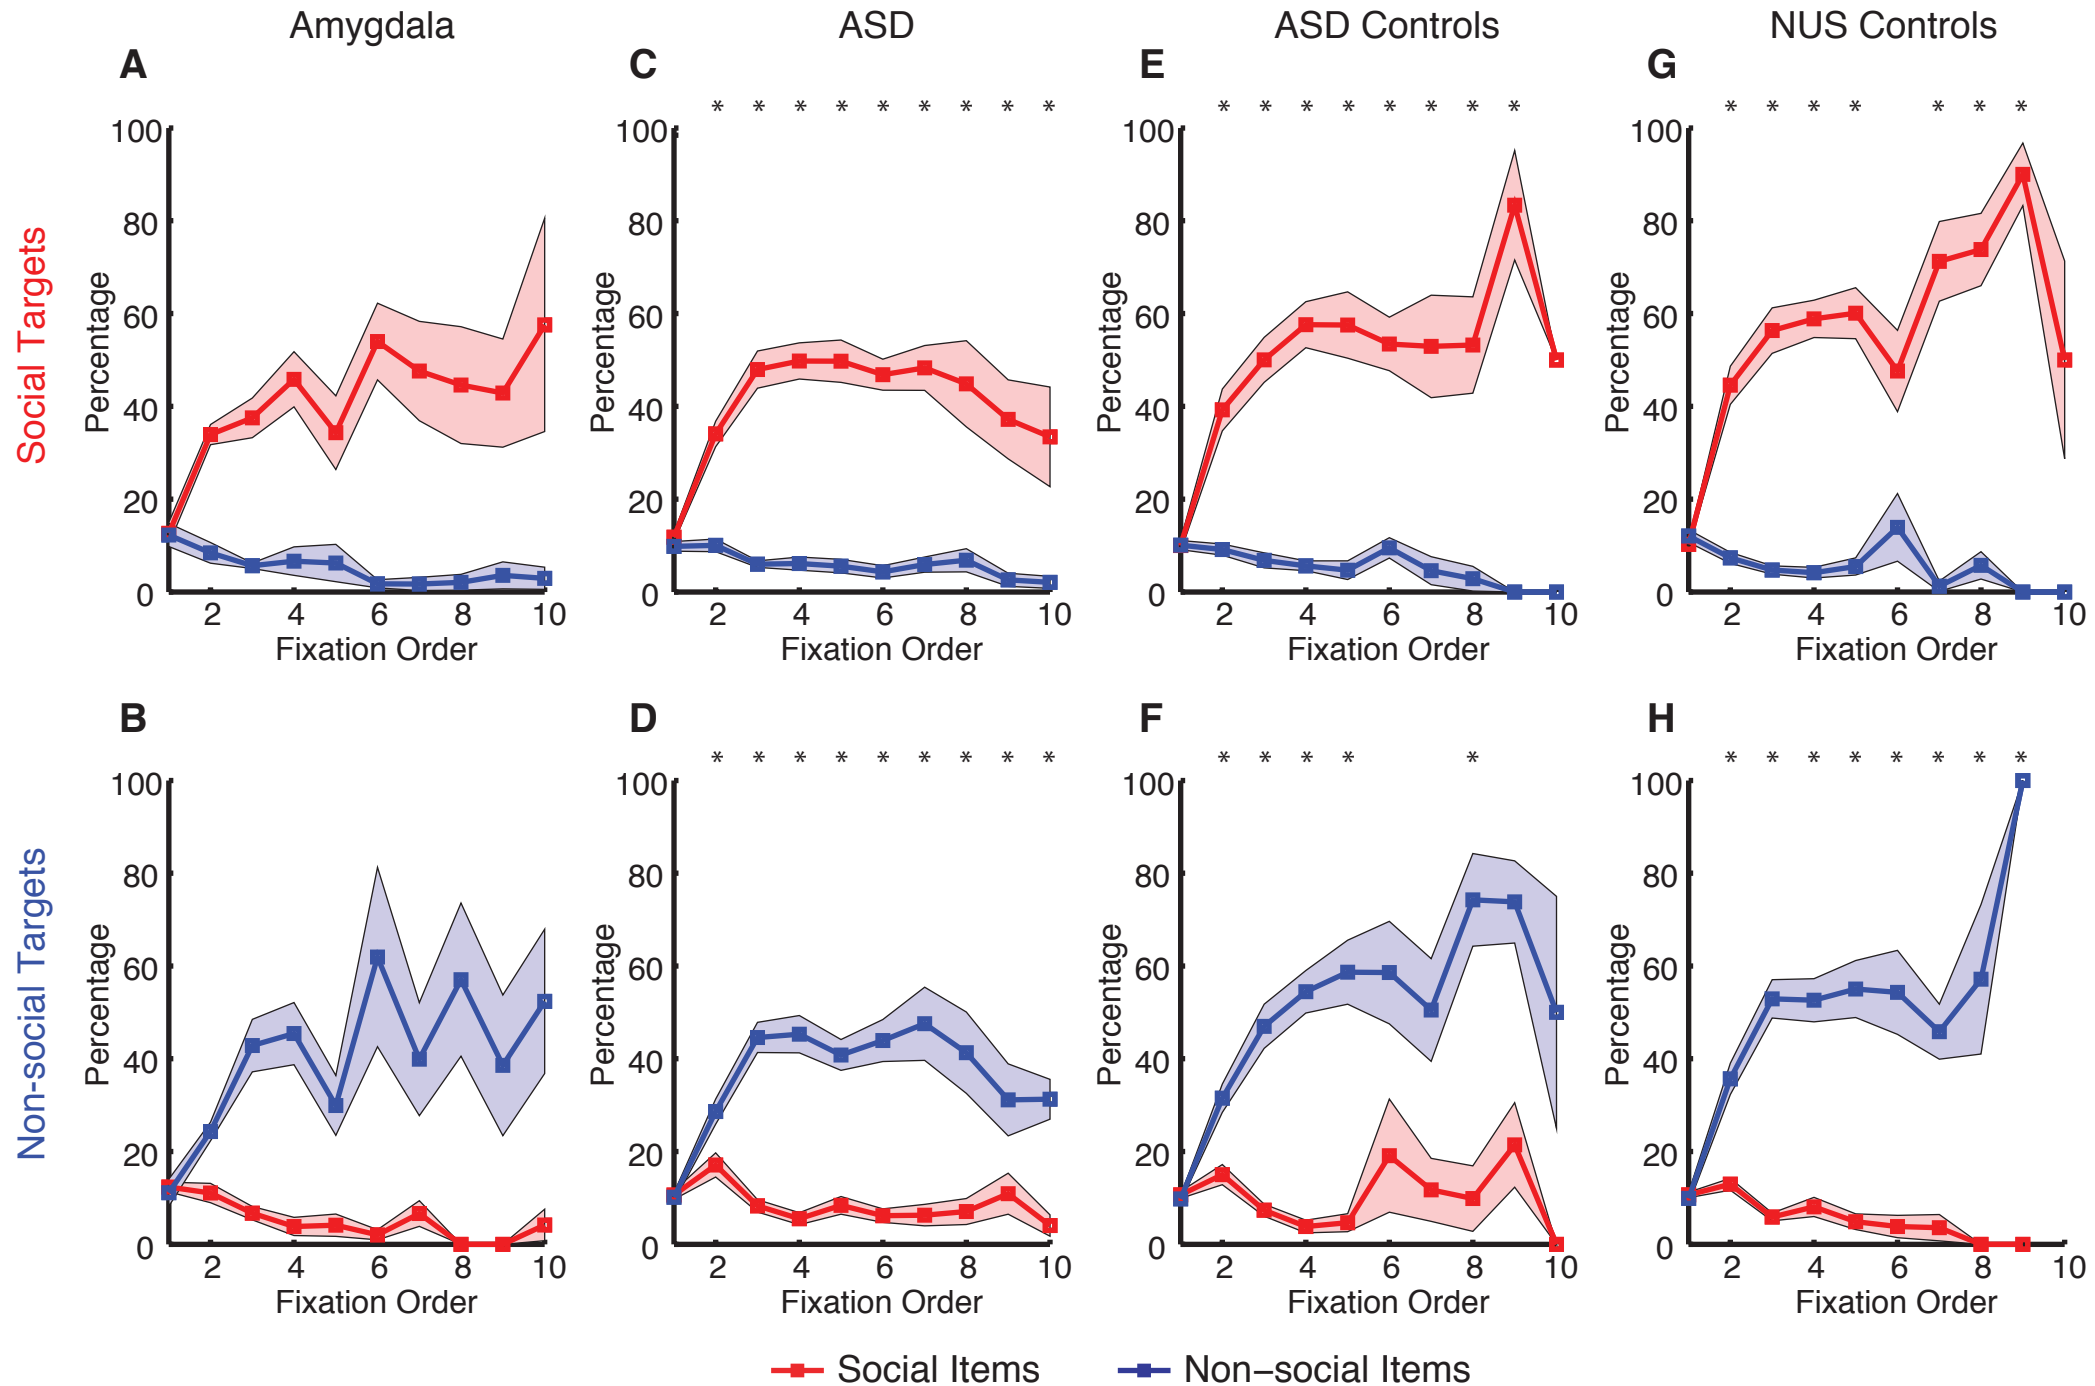

## Supplemental Materials

### Supplemental Results

#### *Behavioral performance: accuracy and reaction time*

We here analyzed the behavioral performance within target-present trials. Across all three experiments, all subject groups (ASD, ASD controls, amygdala lesions, general controls and NUS students) had an average performance above 90% (**Fig. 2**), indicating that they were able to perform the task without difficulty. In Experiment 1 (**Fig. 2A**), only a marginal difference was found between social targets and non-social targets (two-way mixed ANOVA (target type X subject group); main effect of target type:  $F(1,26)=4.21$ ,  $p=0.051$ , effect size  $\eta^2=0.030$ ), and no difference was found between subject groups (main effect of subject group:  $F(3,26)=1.58$ ,  $p=0.22$ ,  $\eta^2=0.12$ ) nor interaction ( $F(3,26)=0.94$ ,  $p=0.44$ ,  $\eta^2=0.020$ ). Similarly, in Experiment 2 (**Fig. 2C**), no difference was found between social targets and non-social targets (main effect of target type:  $F(1,29)=0.17$ ,  $p=0.69$ ,  $\eta^2=0.0022$ ), and no difference was found between subject groups (main effect of subject group:  $F(2,29)=0.86$ ,  $p=0.43$ ,  $\eta^2=0.034$ ) or any interaction ( $F(2,29)=0.32$ ,  $p=0.73$ ,  $\eta^2=0.0086$ ). Finally, also in Experiment 3 (**Fig. 2E**), no difference was found between social targets and non-social targets (main effect of target type:  $F(1,31)=3.59$ ,  $p=0.068$ ,  $\eta^2=0.036$ ), nor between subject groups (main effect of subject group:  $F(3,31)=0.15$ ,  $p=0.93$ ,  $\eta^2=0.0089$ ) or interaction ( $F(3,31)=0.58$ ,  $p=0.63$ ,  $\eta^2=0.018$ ), showing that overall people with ASD and amygdala lesion patients still had similar performance in terms of accuracy compared to controls.

In Experiment 1, non-social targets were detected more quickly by all subject groups (**Fig. 2B**; two-way mixed ANOVA (target type X subject group); main effect of target type:  $F(1,26)=199.4$ ,  $p=1.05 \times 10^{-13}$ ,  $\eta^2=0.13$ ), an effect that showed only a weak interaction with subject group ( $F(3,26)=2.83$ ,  $p=0.058$ ,  $\eta^2=0.0057$ ). General control subjects and NUS control subjects showed overall faster detection of targets (main effect of subject group:  $F(3,26)=5.40$ ,  $p=0.0050$ ,  $\eta^2=0.32$ ), but there was no difference between

amygdala patients vs. general controls, amygdala patients vs. people with ASD, people with ASD vs. general controls, or general controls vs. NUS controls (two-tailed t-test, all  $p>0.05$ ). In Experiment 2, non-social targets still featured faster detection due to their being more distinct from one another (**Fig. 2D**; main effect of target type:  $F(1,29)=75.4$ ,  $p=1.47\times 10^{-9}$ ,  $\eta^2=0.068$ ), but the faster detection of non-social targets did not depend on subject groups (interaction between target type and subject group:  $F(2,29)=0.31$ ,  $p=0.74$ ,  $\eta^2=5.60\times 10^{-4}$ ; main effect of subject group:  $F(2,29)=3.01$ ,  $p=0.065$ ,  $\eta^2=0.16$ ). Notably, across independent samples of people with ASD, we found no difference between Experiment 1 and Experiment 2 in detection accuracy (unpaired t-test:  $t(19)=-0.69$ ,  $p=0.50$ , effect size in Hedges's  $g$  (standardized mean difference):  $g=-0.30$ ) or RT ( $t(19)=-0.39$ ,  $p=0.70$ ,  $g=-0.17$ ). This argues against the influence of low-level visual properties on our task.

With simpler arrays in Experiment 3, non-social targets that were more distinct from one another retained their advantage to be detected faster (**Fig. 2F**; two-way mixed ANOVA (target type X subject group); main effect of target type:  $F(1,31)=13.2$ ,  $p=9.82\times 10^{-4}$ ,  $\eta^2=0.0078$ ). ASD controls and NUS controls showed marginally faster detection of targets (main effect of subject group:  $F(3,31)=2.38$ ,  $p=0.088$ ,  $\eta^2=0.18$ ), but there was no interaction ( $F(3,31)=0.38$ ,  $p=0.77$ ,  $\eta^2=6.80\times 10^{-4}$ ) or significant difference between amygdala patients vs. people with ASD, people with ASD vs. ASD controls, or ASD controls vs. NUS controls (two-tailed t-tests separately for social vs. non-social targets, all  $p>0.05$ ). Lower task difficulty was confirmed with a shorter RT compared to Experiment 1 (paired t-test for NUS controls:  $t(10)=10.2$ ,  $p=1.38\times 10^{-6}$ ,  $g=2.11$ ; paired t-test for amygdala patients:  $t(2)=17.7$ ,  $p=0.0032$ ,  $g=2.27$ ; unpaired t-test for people with ASD:  $t(19)=4.56$ ,  $p=2.13\times 10^{-4}$ ,  $g=1.97$ ) and Experiment 2 (paired t-test for ASD controls:  $t(7)=6.13$ ,  $p=4.76\times 10^{-4}$ ,  $g=1.95$ ; paired t-test for NUS controls:  $t(10)=10.8$ ,  $p=7.83\times 10^{-7}$ ,  $g=2.53$ ).

*Missing detection of targets was not prominent in amygdala lesion patients*

**Fig. 3M-O** summarizes the percentage of trials with misses across subject groups. In Experiment 1 (**Fig. 3M**), no difference was found between social and non-social targets (two-way mixed ANOVA (target type X subject group); main effect of target type:  $F(1,26)=0.28$ ,  $p=0.60$ , effect size  $\eta^2=8.90\times 10^{-4}$ ) nor interaction ( $F(3,26)=0.50$ ,  $p=0.68$ , effect size  $\eta^2=0.0049$ ). However, NUS controls had significantly fewer misses (main effect of subject group:  $F(3,26)=5.45$ ,  $p=0.0048$ ,  $\eta^2=0.35$ ; t-test against general controls:  $t(17)=3.44$ ,  $p=0.0032$ , effect size in Hedges's  $g$  (standardized mean difference):  $g=1.53$  for social targets, and  $t(17)=2.21$ ,  $p=0.041$ ,  $g=0.98$  for non-social targets), which was likely due to the faster RT (**Fig. 2B**; see **Supplemental Discussion**). But compared to general controls, neither people with ASD ( $t(14)=0.59$ ,  $p=0.56$ ,  $g=0.28$  for social targets, and  $t(14)=0.53$ ,  $p=0.60$ ,  $g=0.25$  for non-social targets) nor amygdala lesion patients ( $t(9)=1.15$ ,  $p=0.27$ ,  $g=0.71$  for social targets, and  $t(9)=0.51$ ,  $p=0.62$ ,  $g=0.32$  for non-social targets) had more misses, suggesting that the amygdala is not essential for preferential coding of biologically relevant stimuli into conscious perception in this visual search task.

We repeated the analysis by excluding the last 2 fixations landing on the target for misses and we derived qualitatively the same results.

Similarly, in Experiment 2 (**Fig. 3N**), no difference was found between social and non-social targets (main effect of target type:  $F(1,29)=0.10$ ,  $p=0.75$ ,  $\eta^2=1.34\times 10^{-4}$ ) nor interaction ( $F(2,29)=0.60$ ,  $p=0.56$ ,  $\eta^2=0.0015$ ), but NUS controls had significantly fewer misses than people with ASD and ASD controls (main effect of subject group:  $F(2,29)=4.57$ ,  $p=0.019$ ,  $\eta^2=0.23$ ). People with ASD had comparable misses to those seen in ASD controls (unpaired t-test:  $t(19)=2.03$ ,  $p=0.057$ ,  $g=0.87$  for social targets and  $t(19)=1.37$ ,  $p=0.19$ ,  $g=0.59$  for non-social targets). Notably, with an independent sample of people with ASD, Experiment 2 had comparable percentages of trials with misses as Experiment 1 (unpaired t-test:  $t(19)=-1.23$ ,  $p=0.23$ ,  $g=-0.53$ ).

With an easier task in Experiment 3 (**Fig. 3O**), we found the percentage of trials with misses decreased compared to Experiment 2 (both experiments had equal saliency



between social and non-social items; two-way ANOVA (experiment X subject group (ASD, ASD controls and NUS controls)); main effect of experiment:  $F(1,58)=4.99$ ,  $p=0.029$ ,  $\eta^2=0.060$ ; paired t-test for people with ASD:  $t(12)=2.76$ ,  $p=0.017$ ,  $g=0.78$ ; paired t-test for ASD controls:  $t(7)=1.99$ ,  $p=0.087$ ,  $g=0.90$ ; paired t-test for NUS controls:  $t(10)=3.28$ ,  $p=0.0082$ ,  $g=1.15$ ), consistent with the idea that the percentage of misses is a function of the task difficulty (Rutishauser and Koch, 2007). We found no difference between social and non-social targets (two-way mixed ANOVA (target type X subject group); main effect of target type:  $F(1,31)=0.77$ ,  $p=0.39$ ,  $\eta^2=0.0020$ ), suggesting that social and non-social targets had equal strength to be encoded into consciousness. However, ASD controls and NUS controls had significantly fewer misses (main effect of subject group:  $F(3,31)=4.57$ ,  $p=0.0092$ ,  $\eta^2=0.27$ ), which was likely due to the faster RT (**Fig. 2F**; see **Supplemental Discussion**). People with ASD had more misses than ASD controls (t-test,  $t(19)=2.05$ ,  $p=0.054$ ,  $g=0.89$  for social targets and  $t(19)=2.17$ ,  $p=0.043$ ,  $g=0.94$  for non-social targets), but had similar number of misses as amygdala lesion patients ( $t(14)=1.62$ ,  $p=0.13$ ,  $g=0.98$  for social targets and  $t(14)=0.073$ ,  $p=0.94$ ,  $g=0.044$  for non-social targets). ASD controls had similar number of misses as NUS controls ( $t(17)=0.39$ ,  $p=0.70$ ,  $g=0.17$  for social targets and  $t(17)=0.94$ ,  $p=0.36$ ,  $g=0.42$  for non-social targets).

We lastly performed a subject-by-subject correlation analysis to confirm that the percentage of misses is a function of task difficulty. Task difficulty is typically measured by the time required to find the target (Treisman, 1988, 1998, Wolfe, 1998). In Experiment 1, there was strong subject-by-subject correlation between RT and the percentage of misses (Pearson correlation; all subjects:  $r=0.72$ ,  $p=8.31 \times 10^{-6}$ ; amygdala lesion patients:  $r=0.97$ ,  $p=0.15$ ; people with ASD:  $r=0.67$ ,  $p=0.068$ ; general controls:  $r=0.57$ ,  $p=0.14$ ; NUS controls:  $r=0.22$ ,  $p=0.51$ ). Strong correlations were observed in Experiment 2 (all subjects:  $r=0.84$ ,  $p=2.29 \times 10^{-9}$ ; people with ASD:  $r=0.89$ ,  $p=4.53 \times 10^{-5}$ ; ASD controls:  $r=0.69$ ,  $p=0.060$ ; NUS controls:  $r=0.87$ ,  $p=5.52 \times 10^{-4}$ ) and Experiment 3 (all subjects:  $r=0.76$ ,  $p=9.60 \times 10^{-8}$ ; amygdala lesion patients:  $r=0.90$ ,  $p=0.29$ ; people with ASD:  $r=0.89$ ,  $p=5.58 \times 10^{-5}$ ; ASD controls:  $r=0.89$ ,  $p=0.0034$ ; NUS controls:  $r=0.23$ ,

p=0.50) as well. These results showed that the percentage of misses is a function of task difficulty.

### *Reduced orientation towards target-relevant items in visual search*

We further compared people with ASD to general controls and found that social items attracted more attention (two-way mixed ANOVA (target type X subject group); main effect of target type; average of fixations 2 to 10: social: 35.11±3.52 (mean±SEM), non-social: 22.74±2.64;  $F(1,14)=24.7$ ,  $p=2.05\times 10^{-4}$ ,  $\eta^2=0.21$ ) and people with ASD had reduced target-relevant effects (ASD: 22.20±3.30, general control: 35.64±3.05;  $F(1,14)=8.97$ ,  $p=9.64\times 10^{-3}$ ,  $\eta^2=0.25$ ). Fixation-by-fixation analysis revealed that the impairment in people with ASD mainly came from the initial fixations of their search (fixations 2 to 5: 16.78±3.54; see **Supplemental Table 5**). However, there was a weak interaction (average of fixations 2 to 10:  $F(1,14)=4.86$ ,  $p=0.045$ ,  $\eta^2=0.041$ ), suggesting that compared to general controls, people with ASD were more impaired in orienting to socially relevant targets.

We next compared amygdala lesion patients with general controls. Social targets still attracted more attention than non-social targets (two-way mixed ANOVA (target type X subject group); main effect of target type; average of fixations 2 to 10: social: 42.80±1.89, non-social: 24.76±3.37;  $F(1,9)=41.1$ ,  $p=1.23\times 10^{-4}$ ,  $\eta^2=0.52$ ), but there was no difference between amygdala patients and controls for the average of all fixations (main effect of subject group: amygdala: 28.81±1.02, general control: 35.64±3.05;  $F(1,9)=1.74$ ,  $p=0.22$ ,  $\eta^2=0.059$ ), early fixations (amygdala: 26.38±1.35, general control: 31.47±2.62;  $F(1,9)=1.28$ ,  $p=0.29$ ,  $\eta^2=0.041$ ), late fixations (amygdala: 30.76±2.14, general control: 40.11±5.39;  $F(1,9)=1.04$ ,  $p=0.33$ ,  $\eta^2=0.059$ ), nor at any individual fixation ( $p>0.05$  for all fixations). There was no interaction for all averages or at any fixations (see **Supplemental Table 5**). Separate analysis within social targets (**Fig. 6A**) and non-social targets (**Fig. 6B**) found no reduced attention towards target-relevant items,

for neither social targets nor non-social targets (t-test with general controls:  $p > 0.05$  for all fixations). Further, we observed no difference between general controls and NUS controls ( $p > 0.05$  for all fixations).

### *The attentional deficit in ASD is more severe with high task demands*

Separate analysis within social targets (**Fig. 6E**) showed that the target-relevant effect was not reduced in people with ASD for social targets—we observed no difference across all subject groups (ASD:  $38.82 \pm 3.96$ , amygdala:  $38.94 \pm 6.58$ , NUS control:  $55.65 \pm 4.57$ , ASD control:  $48.43 \pm 4.71$ ; one-way ANOVA,  $p > 0.05$  for all fixations), and when comparing people with ASD and ASD controls, we observed no difference in target-relevant effects ( $p > 0.05$  for all fixations). Still, amygdala lesion patients did not show a different target-relevant effect compared to ASD controls, NUS controls, or people with ASD (**Supplemental Table 5**). Similarly, separate analysis within non-social targets (**Fig. 6F**) showed no difference across all subject groups (ASD:  $32.28 \pm 3.82$ , amygdala:  $39.81 \pm 7.68$ , NUS control:  $45.86 \pm 4.52$ , ASD control:  $44.62 \pm 4.39$ ;  $p > 0.05$  for all fixations). There was no difference for people with ASD vs. ASD controls, amygdala patients vs. people with ASD, amygdala patients vs. ASD controls, nor ASD controls vs. NUS controls (for all comparisons:  $p > 0.05$  for all fixations; see **Supplemental Table 5**).

## **Supplemental Discussion**

### *Missing detection of targets and task difficulty*

Subjects could look at the target during search without detecting it, failures of attention despite fixation that occurred surprisingly frequently in our task, especially with increased task load (Experiments 1 and 2). Task difficulty is typically measured by the time required to find the target and the RT correlates with the size of the search array (Treisman, 1988, 1998, Wolfe, 1998). Thus, a search task is more difficult than another,

or more difficult to one subject than another, if more time is required to find the target. Consistent with previous findings (Rutishauser and Koch, 2007), we found in our experiments that the percentage of misses is a function of the task difficulty—when RT is shorter, the percentage of missed detections is lower, as shown by a strong correlation within each subject group, as well as pronounced differences between subject groups such that NUS controls who had fastest RT also showed the smallest percentage of misses. Furthermore, in the simpler arrays (Experiment 3), not only were the targets easier to detect (shown by a significantly shorter RT), but also the percentage of missed detections was lower. The missed detections might be explained by a capacity limitation (Rutishauser and Koch, 2007). With greater task difficulty, the target item might not effectively be reported as it failed to emerge into “access consciousness”, a failure to transfer from iconic to working memory.

**Supplemental Table 1:** List of ASD diagnosis and evaluation. Autism traits were evaluated by the Autism Diagnostic Observation Schedule (ADOS) and the Autism Diagnostic Interview-Revised (ADI-R). Cutoff scores for ASD on ADOS are 2 for A (communication) and 4 for B (social interaction). C is total (sum of A and B), and D is for stereotyped behavior. Cutoff scores for ASD on ADI-R are 10 for A (social interaction), 8 for B (communication) and 3 for C (stereotyped behavior). Higher scores indicate stronger autism traits.

Abbreviations: Exp: Experiments in which the subject participated. SCQ: Social Communication Questionnaire (cutoff score=14). AQ: Autism Spectrum Quotient. SRS A-SR: Social Responsiveness Scale-2 Adult Form (Self Report). n.a: not available.

| Exp | ID     | ADOS |    |    |   | ADI-R |      |      |      | SCQ  | SRS  |      |
|-----|--------|------|----|----|---|-------|------|------|------|------|------|------|
|     |        | A    | B  | C  | D | A     | B    | C    | D    |      | A-SR | AQ   |
| 1   | RA0780 | 5    | 11 | 16 | 1 | 29    | 18   | 10   | 4    | 31   | 63   | 17   |
| 1   | RA0796 | 4    | 9  | 13 | 0 | n.a.  | n.a. | n.a. | n.a. | 7    | 71   | n.a. |
| 1   | RA0364 | 6    | 11 | 17 | 0 | 21    | 20   | 7    | 3    | 19   | 99   | 30   |
| 1   | RA0083 | 4    | 8  | 12 | 0 | 12    | 12   | 2    | 1    | n.a. | 78   | 27   |
| 1   | RA0844 | 6    | 13 | 19 | 0 | n.a.  | n.a. | n.a. | n.a. | 20   | 71   | 26   |
| 1   | RA0100 | 7    | 14 | 21 | 3 | 25    | 18   | 3    | 3    | 24   | 67   | 28   |
| 1   | RA0101 | 7    | 13 | 20 | 3 | 24    | 18   | 4    | 3    | 23   | 32   | 21   |
| 1,3 | RA0846 | 4    | 11 | 15 | 0 | n.a.  | n.a. | n.a. | n.a. | n.a. | 60   | 33   |
| 2,3 | RA0582 | 3    | 5  | 8  | 3 | n.a.  | n.a. | n.a. | n.a. | n.a. | 116  | n.a. |
| 2,3 | RA0784 | 2    | 5  | 7  | 0 | n.a.  | n.a. | n.a. | n.a. | 26   | 94   | 26   |
| 2,3 | RA0085 | 4    | 9  | 13 | 1 | 21    | 11   | 6    | 3    | 12   | 114  | n.a. |
| 2,3 | RA0880 | 3    | 6  | 9  | 2 | n.a.  | n.a. | n.a. | n.a. | n.a. | n.a. | 20   |
| 2,3 | RA0843 | 3    | 6  | 9  | 1 | n.a.  | n.a. | n.a. | n.a. | n.a. | 66   | 29   |
| 2,3 | RA0584 | 3    | 4  | 7  | 3 | 14    | 12   | 5    | 0    | 21   | 92   | 28   |
| 2,3 | RA0080 | 6    | 14 | 20 | 2 | 16    | 14   | 5    | 1    | 15   | 110  | 39   |
| 2,3 | RA0869 | 3    | 8  | 11 | 0 | n.a.  | n.a. | n.a. | n.a. | n.a. | 71   | 20   |
| 2,3 | RA0847 | 5    | 7  | 12 | 1 | n.a.  | n.a. | n.a. | n.a. | n.a. | 90   | 31   |
| 2   | RA0871 | 2    | 6  | 8  | 2 | n.a.  | n.a. | n.a. | n.a. | n.a. | 79   | 19   |
| 2,3 | RA0626 | 3    | 11 | 14 | 0 | 28    | 22   | 8    | 3    | 21   | 78   | 25   |
| 2,3 | RA0090 | 3    | 8  | 11 | 4 | 8     | 10   | 3    | 0    | n.a. | n.a. | 16   |
| 2,3 | RA0849 | 5    | 8  | 13 | 1 | n.a.  | n.a. | n.a. | n.a. | 30   | 97   | 28   |

**Supplemental Table 2:** List of demographics and psychological evaluation for people with ASD and ASD controls. Intelligence was measured by the Wechsler Abbreviated Scale of Intelligence (WASI).

Abbreviations: Exp: Experiments in which the subject participated. Age: age at testing. Hand: Dominant handedness (A: ambidextrous, L: left, R: right). WASI: Intelligence quotient (IQ) scores from the Wechsler Abbreviated Scale of Intelligence. FSIQ: full-scale IQ. PIQ: performance IQ. VIQ: verbal IQ. n.a.: not available.

| Subject Category | Exp | ID     | Age | Sex | Hand | Race                   | Education         | WASI |     |     |
|------------------|-----|--------|-----|-----|------|------------------------|-------------------|------|-----|-----|
|                  |     |        |     |     |      |                        |                   | FSIQ | PIQ | VIQ |
| ASD              | 1   | RA0780 | 25  | M   | R    | Asian/Pacific Islander | High School       | 103  | 125 | 87  |
|                  | 1   | RA0796 | 26  | M   | R    | Caucasian              | Bachelor's Degree | 133  | 127 | 131 |
|                  | 1   | RA0364 | 31  | M   | A    | Caucasian              | Bachelor's Degree | 106  | 99  | 111 |
|                  | 1   | RA0083 | 26  | M   | R    | Caucasian              | Some College      | 106  | 118 | 94  |
|                  | 1   | RA0844 | 24  | M   | R    | Caucasian              | n.a.              | 107  | 103 | 109 |
|                  | 1   | RA0100 | 23  | F   | R    | Caucasian              | Some College      | 107  | 110 | 102 |
|                  | 1   | RA0101 | 23  | F   | R    | Caucasian              | Some College      | 102  | 103 | 101 |
|                  | 1,3 | RA0846 | 33  | M   | R    | Caucasian              | Bachelor's Degree | 91   | 111 | 50  |
|                  | 2,3 | RA0582 | 32  | M   | R    | Asian/Pacific Islander | Master's Degree   | 124  | 115 | 127 |
|                  | 2,3 | RA0784 | 27  | M   | R    | Caucasian              | Master's Degree   | 128  | 121 | 129 |
|                  | 2,3 | RA0085 | 38  | F   | A    | Caucasian              | Bachelor's Degree | 133  | 122 | 135 |
|                  | 2,3 | RA0880 | 28  | M   | R    | Caucasian              | Bachelor's Degree | 108  | 99  | 114 |
|                  | 2,3 | RA0843 | 20  | F   | A    | Multiracial            | Some College      | 124  | 114 | 128 |
|                  | 2,3 | RA0584 | 26  | F   | R    | Caucasian              | Bachelor's Degree | 125  | 119 | 123 |
|                  | 2,3 | RA0080 | 30  | M   | L    | Caucasian              | Some College      | 115  | 109 | 117 |
|                  | 2,3 | RA0869 | 32  | F   | R    | Hispanic/Latino        | Bachelor's Degree | 88   | 85  | 95  |

|              |     |        |    |   |   |                        |                    |     |     |     |
|--------------|-----|--------|----|---|---|------------------------|--------------------|-----|-----|-----|
|              | 2,3 | RA0847 | 21 | M | R | Asian/Pacific Islander | Some College       | 90  | 97  | 86  |
|              | 2   | RA0871 | 44 | M | R | Caucasian              | Associate's Degree | 89  | 80  | 101 |
|              | 2,3 | RA0626 | 21 | M | A | Asian/Pacific Islander | Middle School      | 125 | 119 | 123 |
|              | 2,3 | RA0090 | 46 | M | R | Caucasian              | Some College       | 56  | 60  | 57  |
|              | 2,3 | RA0849 | 21 | M | R | Hispanic/Latino        | n.a.               | 108 | 103 | 110 |
| ASD Controls | 2,3 | RA0782 | 32 | M | L | Hispanic/Latino        | Bachelor's Degree  | 104 | 114 | 95  |
|              | 2,3 | RA0817 | 24 | M | R | Caucasian              | Bachelor's Degree  | 109 | 106 | 109 |
|              | 2,3 | RA0829 | 30 | F | R | Caucasian              | Bachelor's Degree  | 116 | 111 | 116 |
|              | 2,3 | RA0749 | 59 | M | R | Caucasian              | Associate's Degree | 120 | 128 | 109 |
|              | 2,3 | RA0548 | 46 | M | R | Caucasian              | Some College       | 97  | 109 | 85  |
|              | 2,3 | RA0830 | 25 | M | R | Caucasian              | Bachelor's Degree  | 125 | 121 | 122 |
|              | 2,3 | RA0842 | 32 | M | R | Caucasian              | Bachelor's Degree  | 117 | 110 | 119 |
|              | 2,3 | RA0835 | 39 | F | R | Hispanic/Latino        | Bachelor's Degree  | 102 | 99  | 104 |

**Supplemental Table 3:** List of demographics and psychological evaluation for amygdala lesion patients (AP, AM and BG) and general controls. Intelligence was measured by the Wechsler Abbreviated Scale of Intelligence (WASI). AM and BG’s IQ was measured by the HAWIE-R ('Hamburg-Wechsler Intelligenztest für Erwachsene in revidierter Fassung'), a German-language adaptation of the Wechsler Intelligence Test for Adults-Revised (WAIS-R), which provides a measure of verbal, performance, and full-scale IQ.

Abbreviations: Age: age at testing. Hand: Dominant handedness (A: ambidextrous, L: left, R: right). Benton: Benton Facial Recognition Test, long form score. Benton scores 41-54 are in the normal range. WASI: IQ scores from the Wechsler Abbreviated Scale of Intelligence. FSIQ: full-scale IQ. PIQ: performance IQ. VIQ: verbal IQ. n.a.: not available.

| ID     | Age | Sex | Hand | Race                   | Education                        | Benton | WASI |      |      |
|--------|-----|-----|------|------------------------|----------------------------------|--------|------|------|------|
|        |     |     |      |                        |                                  |        | FSIQ | PIQ  | VIQ  |
| AP     | 27  | F   | R    | Asian/Pacific Islander | Bachelor's Degree                | 50     | 98   | 106  | 92   |
| AM     | 38  | F   | A    | Caucasian              | 13 years of education in Germany | 36     | 101  | 103  | 99   |
| BG     | 38  | F   | R    | Caucasian              | 13 years of education in Germany | 41     | 96   | 97   | 94   |
| RA0629 | 32  | F   | A    | Caucasian              | Some College                     | n.a.   | n.a. | n.a. | n.a. |
| RA0633 | 27  | F   | R    | Asian/Pacific Islander | Bachelor's Degree                | n.a.   | n.a. | n.a. | n.a. |
| RA0762 | 23  | F   | A    | Hispanic/Latino        | Some College                     | 50     | 100  | 105  | 95   |
| RA0764 | 31  | F   | R    | Caucasian              | Master's Degree                  | n.a.   | 102  | 103  | 101  |
| RA0829 | 29  | F   | R    | Caucasian              | Bachelor's Degree                | n.a.   | 116  | 111  | 116  |



| ID     | Age | Sex | Hand | Race                | Education         | Benton | WASI |     |     |
|--------|-----|-----|------|---------------------|-------------------|--------|------|-----|-----|
|        |     |     |      |                     |                   |        | FSIQ | PIQ | VIQ |
| RA0835 | 38  | F   | R    | Hispanic/<br>Latino | Bachelor's Degree | 49     | 102  | 99  | 104 |
| RA0848 | 40  | F   | R    | Caucasian           | High School       | n.a.   | 101  | 104 | 98  |
| RA0851 | 35  | F   | R    | Caucasian           | Bachelor's Degree | n.a.   | 107  | 103 | 108 |

**Supplemental Table 4:** Statistical results for general social preference. *All* is the average of fixation 2 to 10. *Early* is the average of fixation 2 to 5, and *Late* is the average of fixation 6 to 10.

| <b>Experiment 1</b>                    |       |        |       |       |       |       |       |       |       |       |                        |        |        |
|----------------------------------------|-------|--------|-------|-------|-------|-------|-------|-------|-------|-------|------------------------|--------|--------|
| <i>One-Way ANOVA</i>                   |       |        |       |       |       |       |       |       |       |       |                        |        |        |
| Fixation Order                         | 1     | 2      | 3     | 4     | 5     | 6     | 7     | 8     | 9     | 10    | All                    | Early  | Late   |
| F-statistic F(3,26)                    | 1.00  | 5.61   | 0.82  | 3.84  | 2.04  | 1.45  | 2.35  | 0.61  | 0.54  | 1.30  | 5.02                   | 5.85   | 2.80   |
| p-value                                | 0.41  | 0.0042 | 0.50  | 0.021 | 0.13  | 0.25  | 0.10  | 0.61  | 0.66  | 0.30  | 0.0070                 | 0.0034 | 0.060  |
| Effect Size                            | 0.10  | 0.39   | 0.086 | 0.31  | 0.19  | 0.14  | 0.21  | 0.066 | 0.060 | 0.13  | 0.37                   | 0.40   | 0.24   |
| <i>Amygdala vs. ASD</i>                |       |        |       |       |       |       |       |       |       |       |                        |        |        |
| Fixation Order                         | 1     | 2      | 3     | 4     | 5     | 6     | 7     | 8     | 9     | 10    | All                    | Early  | Late   |
| t-statistic t(9)                       | -0.71 | 2.72   | -0.13 | 2.34  | 1.43  | 0.31  | 1.27  | 0.67  | 1.67  | 1.66  | 1.92                   | 2.32   | 1.53   |
| p-value                                | 0.50  | 0.024  | 0.90  | 0.044 | 0.19  | 0.76  | 0.23  | 0.52  | 0.13  | 0.13  | 0.086                  | 0.045  | 0.16   |
| Effect Size Hedges's g                 | -0.44 | 1.68   | -0.08 | 1.45  | 0.88  | 0.19  | 0.79  | 0.42  | 1.03  | 1.03  | 1.19                   | 1.44   | 0.95   |
| <i>Amygdala vs. General control</i>    |       |        |       |       |       |       |       |       |       |       |                        |        |        |
| Fixation Order                         | 1     | 2      | 3     | 4     | 5     | 6     | 7     | 8     | 9     | 10    | All                    | Early  | Late   |
| t-statistic t(9)                       | 0.38  | 0.23   | -1.14 | 0.46  | 0.55  | -0.96 | -0.94 | -0.17 | 0.90  | -0.57 | -0.60                  | -0.040 | -0.71  |
| p-value                                | 0.72  | 0.82   | 0.29  | 0.66  | 0.60  | 0.36  | 0.37  | 0.87  | 0.39  | 0.59  | 0.57                   | 0.97   | 0.50   |
| Effect Size Hedges's g                 | 0.23  | 0.14   | -0.70 | 0.28  | 0.34  | -0.59 | -0.58 | -0.11 | 0.56  | -0.35 | -0.37                  | -0.025 | -0.44  |
| <i>ASD vs. General control</i>         |       |        |       |       |       |       |       |       |       |       |                        |        |        |
| Fixation Order                         | 1     | 2      | 3     | 4     | 5     | 6     | 7     | 8     | 9     | 10    | All                    | Early  | Late   |
| t-statistic t(14)                      | 1.66  | -3.24  | -1.23 | -2.63 | -1.77 | -1.79 | -2.68 | -1.41 | -0.83 | -2.59 | -4.18                  | -3.26  | -3.34  |
| p-value                                | 0.12  | 0.0059 | 0.24  | 0.020 | 0.10  | 0.094 | 0.018 | 0.18  | 0.42  | 0.022 | $9.17 \times 10^{-10}$ | 0.0057 | 0.0049 |
| Effect Size Hedges's g                 | 0.78  | -1.53  | -0.58 | -1.24 | -0.84 | -0.85 | -1.26 | -0.66 | -0.41 | -1.26 | -1.98                  | -1.54  | -1.58  |
| <i>General control vs. NUS Control</i> |       |        |       |       |       |       |       |       |       |       |                        |        |        |

| Fixation Order                     | 1     | 2      | 3     | 4     | 5     | 6      | 7     | 8     | 9     | 10   | All   | Early  | Late  |
|------------------------------------|-------|--------|-------|-------|-------|--------|-------|-------|-------|------|-------|--------|-------|
| t-statistic t(17)                  | -1.35 | 1.78   | 1.07  | -0.52 | -1.06 | 0.10   | 0.91  | 1.14  | 0.44  | 0.23 | 1.23  | 0.46   | 1.21  |
| p-value                            | 0.19  | 0.094  | 0.30  | 0.61  | 0.30  | 0.92   | 0.37  | 0.27  | 0.67  | 0.82 | 0.24  | 0.65   | 0.24  |
| Effect Size Hedges's g             | -0.60 | 0.79   | 0.48  | -0.23 | -0.47 | 0.046  | 0.41  | 0.50  | 0.20  | 0.10 | 0.54  | 0.21   | 0.54  |
| <b>Experiment 2</b>                |       |        |       |       |       |        |       |       |       |      |       |        |       |
| <i>One-Way ANOVA</i>               |       |        |       |       |       |        |       |       |       |      |       |        |       |
| Fixation Order                     | 1     | 2      | 3     | 4     | 5     | 6      | 7     | 8     | 9     | 10   | All   | Early  | Late  |
| F-statistic F(2,29)                | 0.54  | 0.98   | 0.15  | 1.88  | 0.80  | 2.25   | 0.70  | 1.92  | 4.06  | 0.35 | 2.28  | 1.14   | 2.14  |
| p-value                            | 0.59  | 0.39   | 0.86  | 0.17  | 0.46  | 0.12   | 0.50  | 0.16  | 0.03  | 0.71 | 0.12  | 0.33   | 0.14  |
| Effect Size                        | 0.036 | 0.064  | 0.010 | 0.11  | 0.052 | 0.13   | 0.05  | 0.12  | 0.22  | 0.02 | 0.14  | 0.073  | 0.13  |
| <i>ASD vs. ASD Control</i>         |       |        |       |       |       |        |       |       |       |      |       |        |       |
| Fixation Order                     | 1     | 2      | 3     | 4     | 5     | 6      | 7     | 8     | 9     | 10   | All   | Early  | Late  |
| t-statistic t(19)                  | 0.12  | -0.97  | 0.39  | 0.84  | -0.52 | -0.13  | -1.09 | -0.80 | 1.66  | 1.20 | 0.35  | -0.09  | 0.51  |
| p-value                            | 0.90  | 0.34   | 0.70  | 0.41  | 0.61  | 0.90   | 0.29  | 0.43  | 0.11  | 0.25 | 0.73  | 0.93   | 0.62  |
| Effect Size Hedges's g             | 0.053 | -0.42  | 0.17  | 0.36  | -0.22 | -0.055 | -0.47 | -0.35 | 0.72  | 0.52 | 0.15  | -0.037 | 0.22  |
| <i>ASD Control vs. NUS Control</i> |       |        |       |       |       |        |       |       |       |      |       |        |       |
| Fixation Order                     | 1     | 2      | 3     | 4     | 5     | 6      | 7     | 8     | 9     | 10   | All   | Early  | Late  |
| t-statistic t(17)                  | -0.74 | 0.41   | 0.48  | 2.21  | 0.67  | 2.00   | -0.62 | 1.03  | 2.90  | 0.65 | 2.30  | 1.24   | 2.20  |
| p-value                            | 0.47  | 0.69   | 0.64  | 0.041 | 0.51  | 0.062  | 0.54  | 0.32  | 0.010 | 0.52 | 0.034 | 0.23   | 0.042 |
| Effect Size Hedges's g             | -0.33 | 0.18   | 0.21  | 0.98  | 0.30  | 0.89   | -0.28 | 0.46  | 1.29  | 0.29 | 1.02  | 0.55   | 0.98  |
| <b>Experiment 3</b>                |       |        |       |       |       |        |       |       |       |      |       |        |       |
| <i>One-Way ANOVA</i>               |       |        |       |       |       |        |       |       |       |      |       |        |       |
| Fixation Order                     | 1     | 2      | 3     | 4     | 5     | 6      | 7     | 8     | 9     | 10   | All   | Early  | Late  |
| F-statistic F(3,31)                | 0.36  | 0.050  | 0.79  | 2.10  | 0.69  | 1.13   | 1.92  | 0.51  | 0.63  | 1.21 | 1.20  | 1.13   | 0.62  |
| p-value                            | 0.79  | 0.98   | 0.51  | 0.12  | 0.56  | 0.35   | 0.15  | 0.68  | 0.60  | 0.34 | 0.32  | 0.35   | 0.61  |
| Effect Size                        | 0.032 | 0.0048 | 0.071 | 0.17  | 0.063 | 0.10   | 0.18  | 0.056 | 0.083 | 0.22 | 0.10  | 0.10   | 0.057 |
| <i>ASD vs. ASD Control</i>         |       |        |       |       |       |        |       |       |       |      |       |        |       |

| Fixation Order                  | 1     | 2      | 3     | 4      | 5     | 6     | 7     | 8      | 9     | 10    | All   | Early | Late  |
|---------------------------------|-------|--------|-------|--------|-------|-------|-------|--------|-------|-------|-------|-------|-------|
| t-statistic t(19)               | 0.52  | -0.24  | 0.064 | -1.44  | -0.78 | -0.47 | -1.09 | -0.10  | -0.73 | 1.15  | -0.73 | -1.09 | -0.63 |
| p-value                         | 0.61  | 0.81   | 0.95  | 0.17   | 0.45  | 0.64  | 0.29  | 0.92   | 0.48  | 0.27  | 0.48  | 0.29  | 0.54  |
| Effect Size Hedges's g          | 0.22  | -0.10  | 0.028 | -0.62  | -0.34 | -0.20 | -0.48 | -0.043 | -0.37 | 0.83  | -0.31 | -0.47 | -0.27 |
| <i>Amygdala vs. ASD</i>         |       |        |       |        |       |       |       |        |       |       |       |       |       |
| Fixation Order                  | 1     | 2      | 3     | 4      | 5     | 6     | 7     | 8      | 9     | 10    | All   | Early | Late  |
| t-statistic t(14)               | -0.14 | -0.008 | -1.50 | -0.15  | -1.11 | -0.18 | 0.10  | -0.63  | -0.13 | 0.032 | -0.69 | -1.24 | -0.21 |
| p-value                         | 0.89  | 0.99   | 0.16  | 0.88   | 0.29  | 0.86  | 0.92  | 0.54   | 0.90  | 0.97  | 0.50  | 0.23  | 0.83  |
| Effect Size Hedges's g          | -0.09 | -0.005 | -0.91 | -0.090 | -0.67 | -0.11 | 0.069 | -0.45  | -0.10 | 0.023 | -0.42 | -0.75 | -0.13 |
| <i>Amygdala vs. ASD Control</i> |       |        |       |        |       |       |       |        |       |       |       |       |       |
| Fixation Order                  | 1     | 2      | 3     | 4      | 5     | 6     | 7     | 8      | 9     | 10    | All   | Early | Late  |
| t-statistic t(9)                | 0.27  | -0.18  | -1.44 | -1.34  | -1.06 | -0.33 | -0.49 | -0.38  | -0.34 | 0.58  | -0.67 | -1.60 | -0.41 |
| p-value                         | 0.79  | 0.86   | 0.19  | 0.21   | 0.32  | 0.75  | 0.64  | 0.71   | 0.75  | 0.62  | 0.52  | 0.14  | 0.69  |
| Effect Size Hedges's g          | 0.17  | -0.11  | -0.89 | -0.83  | -0.66 | -0.20 | -0.35 | -0.27  | -0.24 | 0.33  | -0.41 | -0.99 | -0.26 |

**Supplemental Table 5:** Statistical results for target-relevant effects. *All* is the average of fixation 2 to 10. *Early* is the average of fixation 2 to 5, and *Late* is the average of fixation 6 to 10. NaN: values not available (NUS controls did not have 10 fixations for non-social targets in Experiment 3).

| <b>Experiment 1</b>                                                  |         |          |          |          |         |         |         |        |        |        |          |          |          |
|----------------------------------------------------------------------|---------|----------|----------|----------|---------|---------|---------|--------|--------|--------|----------|----------|----------|
| Two-way ANOVA (target type X subject group): All subject groups      |         |          |          |          |         |         |         |        |        |        |          |          |          |
| Fixation Order                                                       | 1       | 2        | 3        | 4        | 5       | 6       | 7       | 8      | 9      | 10     | All      | Early    | Late     |
| Main effect of target type                                           |         |          |          |          |         |         |         |        |        |        |          |          |          |
| F-statistic<br>F(1,26)                                               | 29.6    | 34.1     | 7.38     | 20       | 13      | 16.4    | 11.4    | 1.92   | 3.27   | 6.97   | 55.4     | 43.9     | 26.3     |
| p-value                                                              | 1.0E-05 | 3.70E-06 | 0.0116   | 0.000135 | 0.00128 | 0.00041 | 0.00234 | 0.178  | 0.0824 | 0.015  | 6.63E-08 | 4.97E-07 | 2.38E-05 |
| Effect Size                                                          | 0.388   | 0.262    | 0.0613   | 0.150    | 0.124   | 0.183   | 0.112   | 0.0291 | 0.0517 | 0.174  | 0.264    | 0.199    | 0.213    |
| Main effect of subject group                                         |         |          |          |          |         |         |         |        |        |        |          |          |          |
| F-statistic<br>F(3,26)                                               | 0.731   | 3.73     | 7.57     | 4.95     | 3.86    | 1.91    | 0.94    | 2.20   | 0.525  | 0.595  | 4.76     | 6.79     | 2.38     |
| p-value                                                              | 0.543   | 0.0236   | 0.000851 | 0.00752  | 0.0207  | 0.152   | 0.435   | 0.112  | 0.669  | 0.625  | 0.00894  | 0.00157  | 0.0927   |
| Effect Size                                                          | 0.018   | 0.124    | 0.325    | 0.227    | 0.192   | 0.0924  | 0.0599  | 0.112  | 0.0318 | 0.0177 | 0.206    | 0.285    | 0.121    |
| Interaction                                                          |         |          |          |          |         |         |         |        |        |        |          |          |          |
| F-statistic<br>F(3,26)                                               | 1.00    | 5.47     | 0.995    | 1.38     | 0.240   | 0.519   | 0.693   | 0.445  | 0.356  | 0.553  | 2.07     | 2.50     | 0.704    |
| p-value                                                              | 0.407   | 0.00475  | 0.411    | 0.270    | 0.867   | 0.673   | 0.565   | 0.723  | 0.785  | 0.651  | 0.129    | 0.0817   | 0.558    |
| Effect Size                                                          | 0.0394  | 0.126    | 0.0248   | 0.0311   | 0.00686 | 0.0173  | 0.0204  | 0.0203 | 0.0169 | 0.0414 | 0.0296   | 0.034    | 0.0171   |
| Two-way ANOVA (target type X subject group): ASD vs. General control |         |          |          |          |         |         |         |        |        |        |          |          |          |
| Fixation Order                                                       | 1       | 2        | 3        | 4        | 5       | 6       | 7       | 8      | 9      | 10     | All      | Early    | Late     |
| Main effect of target type                                           |         |          |          |          |         |         |         |        |        |        |          |          |          |
| F-statistic<br>F(1,14)                                               | 17.0    | 10.5     | 5.76     | 7.58     | 8.35    | 10.5    | 4.99    | 3.38   | 2.29   | 8.34   | 24.7     | 16.6     | 18.2     |
| p-value                                                              | 0.00103 | 0.00585  | 0.0309   | 0.0156   | 0.0119  | 0.00584 | 0.0423  | 0.0872 | 0.154  | 0.0127 | 0.000205 | 0.00113  | 0.000781 |
| Effect Size                                                          | 0.417   | 0.175    | 0.105    | 0.0798   | 0.0945  | 0.165   | 0.0576  | 0.0774 | 0.0728 | 0.226  | 0.209    | 0.150    | 0.171    |
| Main effect of subject group                                         |         |          |          |          |         |         |         |        |        |        |          |          |          |
| F-statistic<br>F(1,14)                                               | 1.76    | 5        | 9.55     | 6.44     | 10.5    | 3.77    | 1.4     | 2.92   | 1.7    | 2.23   | 8.97     | 11.1     | 4.56     |
| p-value                                                              | 0.206   | 0.0422   | 0.00798  | 0.0237   | 0.0059  | 0.0725  | 0.256   | 0.109  | 0.214  | 0.159  | 0.00964  | 0.00489  | 0.0508   |

|                                                                                  |         |          |          |         |          |          |        |          |          |         |          |          |         |
|----------------------------------------------------------------------------------|---------|----------|----------|---------|----------|----------|--------|----------|----------|---------|----------|----------|---------|
| Effect Size                                                                      | 0.0191  | 0.109    | 0.251    | 0.234   | 0.320    | 0.126    | 0.0691 | 0.104    | 0.0595   | 0.0454  | 0.247    | 0.298    | 0.166   |
| <b>Interaction</b>                                                               |         |          |          |         |          |          |        |          |          |         |          |          |         |
| F-statistic F(1,14)                                                              | 2.75    | 10.7     | 1.09     | 2.89    | 0.0232   | 1.34     | 1.81   | 0.0103   | 0.00109  | 4.1     | 4.86     | 5.5      | 2.32    |
| p-value                                                                          | 0.119   | 0.00551  | 0.313    | 0.111   | 0.881    | 0.267    | 0.199  | 0.921    | 0.974    | 0.0638  | 0.0447   | 0.0342   | 0.150   |
| Effect Size                                                                      | 0.0675  | 0.178    | 0.0199   | 0.0304  | 0.000263 | 0.0209   | 0.0210 | 0.000235 | 3.48E-05 | 0.111   | 0.0411   | 0.0498   | 0.0218  |
| <b>Two-way ANOVA (target type X subject group): ASD vs. NUS Control</b>          |         |          |          |         |          |          |        |          |          |         |          |          |         |
| Fixation Order                                                                   | 1       | 2        | 3        | 4       | 5        | 6        | 7      | 8        | 9        | 10      | All      | Early    | Late    |
| <b>Main effect of target type</b>                                                |         |          |          |         |          |          |        |          |          |         |          |          |         |
| F-statistic F(1,17)                                                              | 11.2    | 7.57     | 2.19     | 6.78    | 6.48     | 8.33     | 4.58   | 0.417    | 1.15     | 1.85    | 20.8     | 14.5     | 9.77    |
| p-value                                                                          | 0.00388 | 0.0137   | 0.157    | 0.0185  | 0.0209   | 0.0103   | 0.0471 | 0.527    | 0.299    | 0.195   | 0.000275 | 0.00139  | 0.00616 |
| Effect Size                                                                      | 0.269   | 0.105    | 0.0280   | 0.083   | 0.0946   | 0.139    | 0.103  | 0.00941  | 0.0272   | 0.0865  | 0.164    | 0.100    | 0.168   |
| <b>Main effect of subject group</b>                                              |         |          |          |         |          |          |        |          |          |         |          |          |         |
| F-statistic F(1,17)                                                              | 1.64    | 10.1     | 26.1     | 11.6    | 6.64     | 3.14     | 0.766  | 6.48     | 1.09     | 0.264   | 10.3     | 15.2     | 5.68    |
| p-value                                                                          | 0.217   | 0.00545  | 8.75E-05 | 0.00335 | 0.0196   | 0.0942   | 0.394  | 0.0209   | 0.311    | 0.615   | 0.00509  | 0.00115  | 0.0290  |
| Effect Size                                                                      | 0.0277  | 0.216    | 0.457    | 0.278   | 0.183    | 0.0884   | 0.0207 | 0.163    | 0.0343   | 0.00419 | 0.260    | 0.361    | 0.134   |
| <b>Interaction</b>                                                               |         |          |          |         |          |          |        |          |          |         |          |          |         |
| F-statistic F(1,17)                                                              | 0.335   | 5.66     | 0.0687   | 2.02    | 0.300    | 0.695    | 1.47   | 0.762    | 0.0293   | 0.688   | 1.67     | 2.52     | 0.387   |
| p-value                                                                          | 0.570   | 0.0294   | 0.796    | 0.173   | 0.591    | 0.416    | 0.242  | 0.395    | 0.866    | 0.421   | 0.213    | 0.131    | 0.542   |
| Effect Size                                                                      | 0.00807 | 0.0787   | 0.000877 | 0.0247  | 0.00438  | 0.0116   | 0.033  | 0.0172   | 0.000694 | 0.0322  | 0.0132   | 0.0174   | 0.00666 |
| <b>Two-way ANOVA (target type X subject group): Amygdala vs. General control</b> |         |          |          |         |          |          |        |          |          |         |          |          |         |
| Fixation Order                                                                   | 1       | 2        | 3        | 4       | 5        | 6        | 7      | 8        | 9        | 10      | All      | Early    | Late    |
| <b>Main effect of target type</b>                                                |         |          |          |         |          |          |        |          |          |         |          |          |         |
| F-statistic F(1,9)                                                               | 21.6    | 32.7     | 6.04     | 20.9    | 10.1     | 9.11     | 10.2   | 1.99     | 3.24     | 12.6    | 41.1     | 38.5     | 21.9    |
| p-value                                                                          | 0.00121 | 0.000287 | 0.0363   | 0.00134 | 0.0112   | 0.0145   | 0.011  | 0.191    | 0.110    | 0.00745 | 0.000123 | 0.000158 | 0.00115 |
| Effect Size                                                                      | 0.614   | 0.609    | 0.144    | 0.389   | 0.344    | 0.346    | 0.13   | 0.093    | 0.150    | 0.457   | 0.521    | 0.546    | 0.306   |
| <b>Main effect of subject group</b>                                              |         |          |          |         |          |          |        |          |          |         |          |          |         |
| F-statistic F(1,9)                                                               | 0.0201  | 0.128    | 2.16     | 1.07    | 1.26     | 0.00292  | 1.2    | 0.216    | 0.399    | 1.24    | 1.74     | 1.28     | 1.04    |
| p-value                                                                          | 0.890   | 0.729    | 0.176    | 0.327   | 0.292    | 0.958    | 0.303  | 0.653    | 0.545    | 0.298   | 0.219    | 0.286    | 0.335   |
| Effect Size                                                                      | 0.00028 | 0.00311  | 0.118    | 0.0462  | 0.0398   | 9.04E-05 | 0.0885 | 0.0114   | 0.0205   | 0.0328  | 0.0592   | 0.0407   | 0.0588  |

|                                                                         |          |          |          |          |         |         |          |          |         |         |          |          |          |
|-------------------------------------------------------------------------|----------|----------|----------|----------|---------|---------|----------|----------|---------|---------|----------|----------|----------|
| <b>Interaction</b>                                                      |          |          |          |          |         |         |          |          |         |         |          |          |          |
| F-statistic<br>F(1,9)                                                   | 0.153    | 0.022    | 1.3      | 0.528    | 0.718   | 0.861   | 0.00812  | 0.0061   | 1.05    | 0.233   | 0.0129   | 0.00824  | 0.0169   |
| p-value                                                                 | 0.705    | 0.885    | 0.284    | 0.486    | 0.419   | 0.378   | 0.930    | 0.939    | 0.335   | 0.642   | 0.912    | 0.930    | 0.900    |
| Effect Size                                                             | 0.00436  | 0.000409 | 0.0311   | 0.00983  | 0.0244  | 0.0327  | 0.000104 | 0.000285 | 0.0487  | 0.00845 | 0.000163 | 0.000117 | 0.000236 |
| <b>One-Way ANOVA: Social Targets</b>                                    |          |          |          |          |         |         |          |          |         |         |          |          |          |
| Fixation Order                                                          | 1        | 2        | 3        | 4        | 5       | 6       | 7        | 8        | 9       | 10      | All      | Early    | Late     |
| F-statistic<br>F(3,26)                                                  | 1.7259   | 6.9582   | 5.3581   | 6.5733   | 3.6054  | 1.8027  | 1.9806   | 1.1955   | 0.295   | 1.1938  | 5.0931   | 7.8157   | 2.8907   |
| p-value                                                                 | 0.1863   | 0.0014   | 0.0052   | 0.0019   | 0.0266  | 0.1714  | 0.1416   | 0.3309   | 0.8286  | 0.3324  | 0.0066   | 7.03E-04 | 0.0545   |
| Effect Size                                                             | 0.1661   | 0.4453   | 0.382    | 0.4313   | 0.2938  | 0.1722  | 0.186    | 0.1212   | 0.0342  | 0.1253  | 0.3701   | 0.4742   | 0.2501   |
| <b>One-Way ANOVA: Non-social Targets</b>                                |          |          |          |          |         |         |          |          |         |         |          |          |          |
| Fixation Order                                                          | 1        | 2        | 3        | 4        | 5       | 6       | 7        | 8        | 9       | 10      | All      | Early    | Late     |
| F-statistic<br>F(3,26)                                                  | 0.3116   | 1.0076   | 4.9305   | 1.6222   | 1.7633  | 0.7273  | 0.3568   | 1.4464   | 0.5923  | 0.1074  | 2.6043   | 3.2903   | 0.9206   |
| p-value                                                                 | 0.8168   | 0.4052   | 0.0077   | 0.2084   | 0.1789  | 0.5449  | 0.7846   | 0.2521   | 0.6258  | 0.9549  | 0.0733   | 0.0364   | 0.4447   |
| Effect Size                                                             | 0.0347   | 0.1042   | 0.3626   | 0.1577   | 0.1691  | 0.0774  | 0.0395   | 0.143    | 0.0664  | 0.0144  | 0.2311   | 0.2752   | 0.096    |
| <b>Experiment 2</b>                                                     |          |          |          |          |         |         |          |          |         |         |          |          |          |
| <b>Two-way ANOVA (target type X subject group): All subject groups</b>  |          |          |          |          |         |         |          |          |         |         |          |          |          |
| Fixation Order                                                          | 1        | 2        | 3        | 4        | 5       | 6       | 7        | 8        | 9       | 10      | All      | Early    | Late     |
| <b>Main effect of target type</b>                                       |          |          |          |          |         |         |          |          |         |         |          |          |          |
| F-statistic<br>F(1,29)                                                  | 93.9     | 28.2     | 19.9     | 14.2     | 12.1    | 7.64    | 12.4     | 9.04     | 0.646   | 2.33    | 31.3     | 39.2     | 15       |
| p-value                                                                 | 1.34E-10 | 1.07E-05 | 0.000112 | 0.000748 | 0.00161 | 0.00982 | 0.00144  | 0.0054   | 0.428   | 0.139   | 4.91E-06 | 7.88E-07 | 0.000574 |
| Effect Size                                                             | 0.699    | 0.315    | 0.118    | 0.0847   | 0.134   | 0.0749  | 0.135    | 0.113    | 0.00570 | 0.0452  | 0.169    | 0.224    | 0.105    |
| <b>Main effect of subject group</b>                                     |          |          |          |          |         |         |          |          |         |         |          |          |          |
| F-statistic<br>F(2,29)                                                  | 0.250    | 4.82     | 2.82     | 7.18     | 4.31    | 3.63    | 4.89     | 2.47     | 3.36    | 0.422   | 6.00     | 6.63     | 4.52     |
| p-value                                                                 | 0.78     | 0.0156   | 0.0763   | 0.00293  | 0.0229  | 0.0392  | 0.0148   | 0.102    | 0.0487  | 0.660   | 0.00662  | 0.00426  | 0.0196   |
| Effect Size                                                             | 0.00131  | 0.084    | 0.116    | 0.244    | 0.124   | 0.124   | 0.135    | 0.0749   | 0.133   | 0.0134  | 0.195    | 0.189    | 0.162    |
| <b>Interaction</b>                                                      |          |          |          |          |         |         |          |          |         |         |          |          |          |
| F-statistic<br>F(2,29)                                                  | 0.56     | 1.13     | 0.00234  | 0.531    | 0.299   | 1.1     | 0.768    | 0.44     | 1.81    | 0.644   | 0.567    | 0.569    | 0.669    |
| p-value                                                                 | 0.578    | 0.337    | 0.998    | 0.593    | 0.744   | 0.348   | 0.473    | 0.648    | 0.182   | 0.533   | 0.573    | 0.572    | 0.520    |
| Effect Size                                                             | 0.00832  | 0.0252   | 2.76E-05 | 0.00634  | 0.00661 | 0.0215  | 0.0167   | 0.0110   | 0.0319  | 0.025   | 0.00614  | 0.00651  | 0.00939  |
| <b>Two-way ANOVA (target type X subject group): ASD vs. ASD Control</b> |          |          |          |          |         |         |          |          |         |         |          |          |          |

| Fixation Order                                                   | 1        | 2        | 3        | 4        | 5       | 6        | 7       | 8       | 9       | 10       | All      | Early    | Late     |
|------------------------------------------------------------------|----------|----------|----------|----------|---------|----------|---------|---------|---------|----------|----------|----------|----------|
| Main effect of target type                                       |          |          |          |          |         |          |         |         |         |          |          |          |          |
| F-statistic F(1,19)                                              | 50       | 19.7     | 10.1     | 6.04     | 9.7     | 1.69     | 11.5    | 4.67    | 0.215   | 1.31     | 14.1     | 20.5     | 6.62     |
| p-value                                                          | 1.00E-06 | 0.000279 | 0.00487  | 0.0238   | 0.0057  | 0.209    | 0.00309 | 0.0437  | 0.648   | 0.266    | 0.00133  | 0.000231 | 0.0186   |
| Effect Size                                                      | 0.677    | 0.285    | 0.109    | 0.0729   | 0.102   | 0.0298   | 0.183   | 0.0792  | 0.00354 | 0.0291   | 0.138    | 0.188    | 0.0861   |
| Main effect of subject group                                     |          |          |          |          |         |          |         |         |         |          |          |          |          |
| F-statistic F(1,19)                                              | 0.142    | 3.12     | 0.129    | 4.49     | 4.58    | 2.95     | 1.52    | 4.59    | 0.544   | 0.0133   | 2.7      | 3.61     | 1.85     |
| p-value                                                          | 0.710    | 0.0934   | 0.724    | 0.0475   | 0.0456  | 0.102    | 0.232   | 0.0453  | 0.47    | 0.909    | 0.117    | 0.0729   | 0.19     |
| Effect Size                                                      | 0.000485 | 0.0590   | 0.00461  | 0.132    | 0.135   | 0.0854   | 0.0374  | 0.116   | 0.0174  | 0.000364 | 0.0838   | 0.102    | 0.0581   |
| Interaction                                                      |          |          |          |          |         |          |         |         |         |          |          |          |          |
| F-statistic F(1,19)                                              | 0.0169   | 1.55     | 0.000241 | 0.419    | 0.298   | 0.0203   | 0.617   | 0.167   | 3.60    | 1.27     | 0.233    | 0.147    | 0.779    |
| p-value                                                          | 0.898    | 0.229    | 0.988    | 0.525    | 0.592   | 0.888    | 0.442   | 0.687   | 0.0731  | 0.274    | 0.635    | 0.706    | 0.388    |
| Effect Size                                                      | 0.00023  | 0.0223   | 2.59E-06 | 0.00506  | 0.00312 | 0.000357 | 0.00985 | 0.00284 | 0.0593  | 0.0281   | 0.00228  | 0.00134  | 0.0101   |
| Two-way ANOVA (target type X subject group): ASD vs. NUS Control |          |          |          |          |         |          |         |         |         |          |          |          |          |
| Fixation Order                                                   | 1        | 2        | 3        | 4        | 5       | 6        | 7       | 8       | 9       | 10       | All      | Early    | Late     |
| Main effect of target type                                       |          |          |          |          |         |          |         |         |         |          |          |          |          |
| F-statistic F(1,22)                                              | 80.0     | 15.7     | 21.7     | 15.8     | 7.15    | 6.62     | 6.05    | 6.27    | 2.4     | 3.69     | 23.8     | 24.6     | 13.2     |
| p-value                                                          | 8.85E-09 | 0.000653 | 0.00012  | 0.000636 | 0.0138  | 0.0173   | 0.0222  | 0.0202  | 0.136   | 0.0698   | 7.16E-05 | 5.78E-05 | 0.00145  |
| Effect Size                                                      | 0.710    | 0.269    | 0.118    | 0.0966   | 0.120   | 0.0849   | 0.0853  | 0.102   | 0.0278  | 0.0990   | 0.161    | 0.193    | 0.115    |
| Main effect of subject group                                     |          |          |          |          |         |          |         |         |         |          |          |          |          |
| F-statistic F(1,22)                                              | 0.167    | 9.88     | 5.04     | 12.4     | 6.11    | 5.84     | 8.73    | 1.85    | 6.12    | 0.711    | 9.43     | 10.9     | 7.27     |
| p-value                                                          | 0.687    | 0.00473  | 0.0352   | 0.00194  | 0.0217  | 0.0245   | 0.00732 | 0.187   | 0.0215  | 0.410    | 0.0056   | 0.00322  | 0.0132   |
| Effect Size                                                      | 0.000641 | 0.101    | 0.142    | 0.276    | 0.110   | 0.129    | 0.171   | 0.041   | 0.156   | 0.0141   | 0.206    | 0.208    | 0.172    |
| Interaction                                                      |          |          |          |          |         |          |         |         |         |          |          |          |          |
| F-statistic F(1,22)                                              | 1.11     | 1.69     | 0.004    | 0.194    | 0.479   | 1.4      | 0.28    | 0.804   | 0.213   | 0.00367  | 0.345    | 0.937    | 0.0427   |
| p-value                                                          | 0.303    | 0.207    | 0.950    | 0.664    | 0.496   | 0.249    | 0.602   | 0.379   | 0.649   | 0.952    | 0.563    | 0.344    | 0.838    |
| Effect Size                                                      | 0.00988  | 0.0288   | 2.17E-05 | 0.00118  | 0.00802 | 0.0180   | 0.00395 | 0.0131  | 0.00247 | 9.83E-05 | 0.00233  | 0.00735  | 0.000371 |
| One-Way ANOVA: Social Targets                                    |          |          |          |          |         |          |         |         |         |          |          |          |          |
| Fixation Order                                                   | 1        | 2        | 3        | 4        | 5       | 6        | 7       | 8       | 9       | 10       | All      | Early    | Late     |
| F-statistic F(2,29)                                              | 0.6669   | 3.731    | 2.1064   | 5.2707   | 2.8341  | 3.692    | 1.4271  | 2.5374  | 2.6888  | 1.392    | 3.5797   | 4.5291   | 2.7592   |
| p-value                                                          | 0.521    | 0.0361   | 0.1399   | 0.0112   | 0.0751  | 0.0373   | 0.2564  | 0.0965  | 0.0849  | 0.2653   | 0.0408   | 0.0194   | 0.0800   |



|                                                                         |        |          |         |         |        |         |          |          |         |         |        |          |         |
|-------------------------------------------------------------------------|--------|----------|---------|---------|--------|---------|----------|----------|---------|---------|--------|----------|---------|
| Effect Size                                                             | 0.0440 | 0.2047   | 0.1268  | 0.2666  | 0.1635 | 0.2029  | 0.0896   | 0.1489   | 0.1564  | 0.0904  | 0.198  | 0.238    | 0.1599  |
| <b>One-Way ANOVA: Non-social Targets</b>                                |        |          |         |         |        |         |          |          |         |         |        |          |         |
| Fixation Order                                                          | 1      | 2        | 3       | 4       | 5      | 6       | 7        | 8        | 9       | 10      | All    | Early    | Late    |
| F-statistic<br>F(2,29)                                                  | 0.2385 | 0.6854   | 2.2795  | 5.6748  | 2.1057 | 1.5259  | 9.5718   | 0.781    | 3.0718  | 0.5727  | 8.0094 | 5.8843   | 4.7523  |
| p-value                                                                 | 0.7893 | 0.5119   | 0.1204  | 0.0083  | 0.140  | 0.2344  | 6.43E-04 | 0.4673   | 0.0617  | 0.5707  | 0.0017 | 0.0072   | 0.0164  |
| Effect Size                                                             | 0.0162 | 0.0451   | 0.1359  | 0.2813  | 0.1268 | 0.0952  | 0.3976   | 0.0511   | 0.1748  | 0.0407  | 0.3558 | 0.2887   | 0.2468  |
| <b>Experiment 3</b>                                                     |        |          |         |         |        |         |          |          |         |         |        |          |         |
| <b>Two-way ANOVA (target type X subject group): All subject groups</b>  |        |          |         |         |        |         |          |          |         |         |        |          |         |
| Fixation Order                                                          | 1      | 2        | 3       | 4       | 5      | 6       | 7        | 8        | 9       | 10      | All    | Early    | Late    |
| Main effect of target type                                              |        |          |         |         |        |         |          |          |         |         |        |          |         |
| F-statistic<br>F(1,31)                                                  | 0.429  | 32.9     | 4.07    | 3.78    | 3.03   | 0.268   | 1.24     | 0.0262   | 1.18    | 0.305   | 6.50   | 20.9     | 0.297   |
| p-value                                                                 | 0.517  | 2.59E-06 | 0.0524  | 0.0611  | 0.0916 | 0.609   | 0.277    | 0.873    | 0.301   | 0.596   | 0.0159 | 7.38E-05 | 0.590   |
| Effect Size                                                             | 0.0084 | 0.204    | 0.0168  | 0.0214  | 0.0196 | 0.00239 | 0.0179   | 0.000541 | 0.0554  | 0.00917 | 0.0432 | 0.065    | 0.00311 |
| Main effect of subject group                                            |        |          |         |         |        |         |          |          |         |         |        |          |         |
| F-statistic<br>F(3,31)                                                  | 0.912  | 2.61     | 1.5     | 1.11    | 3.39   | 0.251   | 0.337    | 1.8      | 8.27    | 0.52    | 3.54   | 2.52     | 2.42    |
| p-value                                                                 | 0.446  | 0.0693   | 0.234   | 0.360   | 0.0301 | 0.860   | 0.799    | 0.177    | 0.00367 | 0.680   | 0.0259 | 0.076    | 0.0855  |
| Effect Size                                                             | 0.0295 | 0.121    | 0.107   | 0.0762  | 0.189  | 0.0173  | 0.0250   | 0.115    | 0.279   | 0.112   | 0.189  | 0.163    | 0.131   |
| Interaction                                                             |        |          |         |         |        |         |          |          |         |         |        |          |         |
| F-statistic<br>F(3,31)                                                  | 0.371  | 0.0487   | 0.596   | 0.925   | 0.810  | 0.918   | 0.385    | 0.111    | 0.181   | 0.702   | 0.528  | 0.750    | 0.352   |
| p-value                                                                 | 0.774  | 0.986    | 0.622   | 0.440   | 0.498  | 0.444   | 0.765    | 0.953    | 0.907   | 0.577   | 0.667  | 0.531    | 0.788   |
| Effect Size                                                             | 0.0218 | 0.000905 | 0.00741 | 0.0158  | 0.0157 | 0.0246  | 0.0167   | 0.00686  | 0.0255  | 0.0633  | 0.0105 | 0.00702  | 0.0111  |
| <b>Two-way ANOVA (target type X subject group): ASD vs. ASD Control</b> |        |          |         |         |        |         |          |          |         |         |        |          |         |
| Fixation Order                                                          | 1      | 2        | 3       | 4       | 5      | 6       | 7        | 8        | 9       | 10      | All    | Early    | Late    |
| Main effect of target type                                              |        |          |         |         |        |         |          |          |         |         |        |          |         |
| F-statistic<br>F(1,19)                                                  | 1.45   | 14.7     | 3.39    | 0.992   | 3.19   | 0.319   | 0.101    | 0.00325  | 1.33    | 0.235   | 2.30   | 13.7     | 0.0445  |
| p-value                                                                 | 0.243  | 0.00110  | 0.0811  | 0.332   | 0.0898 | 0.579   | 0.755    | 0.955    | 0.276   | 0.641   | 0.146  | 0.00152  | 0.835   |
| Effect Size                                                             | 0.0405 | 0.230    | 0.0286  | 0.00931 | 0.0297 | 0.00615 | 0.00224  | 0.000107 | 0.0945  | 0.00971 | 0.0371 | 0.0758   | 0.00122 |
| Main effect of subject group                                            |        |          |         |         |        |         |          |          |         |         |        |          |         |
| F-statistic<br>F(1,19)                                                  | 0.812  | 1.74     | 0.143   | 2.5     | 4.15   | 0.0206  | 0.000245 | 2.06     | 3.12    | 0.00966 | 5.15   | 2.66     | 4.21    |

|                                                                       |                      |          |          |          |          |          |          |                      |          |          |         |                      |         |
|-----------------------------------------------------------------------|----------------------|----------|----------|----------|----------|----------|----------|----------------------|----------|----------|---------|----------------------|---------|
| p-value                                                               | 0.379                | 0.203    | 0.709    | 0.131    | 0.0558   | 0.887    | 0.988    | 0.172                | 0.108    | 0.924    | 0.0352  | 0.120                | 0.0541  |
| Effect Size                                                           | 0.0173               | 0.0395   | 0.00607  | 0.0941   | 0.138    | 0.00068  | 8.91E-06 | 0.0606               | 0.0421   | 0.000689 | 0.139   | 0.0997               | 0.087   |
| Interaction                                                           |                      |          |          |          |          |          |          |                      |          |          |         |                      |         |
| F-statistic F(1,19)                                                   | 0.290                | 0.0256   | 0.144    | 0.177    | 2.70     | 0.000237 | 0.0624   | 0.163                | 0.242    | 2.13     | 0.134   | 1.15                 | 0.0428  |
| p-value                                                               | 0.597                | 0.875    | 0.708    | 0.678    | 0.117    | 0.988    | 0.806    | 0.692                | 0.634    | 0.182    | 0.719   | 0.297                | 0.838   |
| Effect Size                                                           | 0.00808              | 0.000400 | 0.00121  | 0.00166  | 0.0251   | 4.57E-06 | 0.00139  | 0.00536              | 0.0172   | 0.0882   | 0.00216 | 0.00636              | 0.00117 |
| Two-way ANOVA (target type X subject group): ASD vs. NUS Control      |                      |          |          |          |          |          |          |                      |          |          |         |                      |         |
| Fixation Order                                                        | 1                    | 2        | 3        | 4        | 5        | 6        | 7        | 8                    | 9        | 10       | All     | Early                | Late    |
| Main effect of target type                                            |                      |          |          |          |          |          |          |                      |          |          |         |                      |         |
| F-statistic F(1,22)                                                   | 0.209                | 23.4     | 4.70     | 4.54     | 3.74     | 0.938    | 1.02     | 0.00971              | 0.764    | NaN      | 8.87    | 19.1                 | 1.18    |
| p-value                                                               | 0.652                | 7.85E-05 | 0.0413   | 0.0445   | 0.0662   | 0.344    | 0.326    | 0.923                | 0.405    | NaN      | 0.00694 | 0.000246             | 0.289   |
| Effect Size                                                           | 0.00622              | 0.178    | 0.0271   | 0.0398   | 0.0471   | 0.008    | 0.0226   | 0.00026 <sub>1</sub> | 0.0424   | NaN      | 0.0604  | 0.0877               | 0.0117  |
| Main effect of subject group                                          |                      |          |          |          |          |          |          |                      |          |          |         |                      |         |
| F-statistic F(1,22)                                                   | 2.72                 | 6.31     | 3.14     | 1.69     | 5.38     | 0.0101   | 1.1      | 4.56                 | 24.7     | NaN      | 8.25    | 5.02                 | 5.67    |
| p-value                                                               | 0.113                | 0.0198   | 0.0903   | 0.207    | 0.0301   | 0.921    | 0.308    | 0.0485               | 0.000774 | NaN      | 0.00886 | 0.0355               | 0.0268  |
| Effect Size                                                           | 0.0344               | 0.146    | 0.106    | 0.0541   | 0.131    | 0.000375 | 0.0349   | 0.126                | 0.332    | NaN      | 0.215   | 0.151                | 0.165   |
| Interaction                                                           |                      |          |          |          |          |          |          |                      |          |          |         |                      |         |
| F-statistic F(1,22)                                                   | 0.857                | 0.125    | 0.049    | 0.969    | 0.702    | 4.34     | 1.28     | 0.0845               | 0.0764   | NaN      | 0.359   | 7.54E-0 <sub>5</sub> | 0.396   |
| p-value                                                               | 0.365                | 0.727    | 0.827    | 0.336    | 0.411    | 0.0497   | 0.273    | 0.775                | 0.788    | NaN      | 0.555   | 0.993                | 0.536   |
| Effect Size                                                           | 0.0255               | 0.000952 | 0.000283 | 0.00849  | 0.00884  | 0.037    | 0.0283   | 0.00227              | 0.00424  | NaN      | 0.00245 | 3.47E-07             | 0.00391 |
| Two-way ANOVA (target type X subject group): Amygdala vs. ASD Control |                      |          |          |          |          |          |          |                      |          |          |         |                      |         |
| Fixation Order                                                        | 1                    | 2        | 3        | 4        | 5        | 6        | 7        | 8                    | 9        | 10       | All     | Early                | Late    |
| Main effect of target type                                            |                      |          |          |          |          |          |          |                      |          |          |         |                      |         |
| F-statistic F(1,9)                                                    | 0.498                | 9.55     | 0.164    | 0.00920  | 0.00348  | 0.00523  | 0.269    | 0.312                | 0.387    | 10.6     | 0.228   | 2.51                 | 0.0575  |
| p-value                                                               | 0.498                | 0.0129   | 0.695    | 0.926    | 0.954    | 0.944    | 0.620    | 0.600                | 0.597    | 0.190    | 0.645   | 0.148                | 0.816   |
| Effect Size                                                           | 0.0198               | 0.308    | 0.00256  | 0.000132 | 2.87E-05 | 0.000222 | 0.0121   | 0.0299               | 0.118    | 0.126    | 0.011   | 0.0232               | 0.00374 |
| Main effect of subject group                                          |                      |          |          |          |          |          |          |                      |          |          |         |                      |         |
| F-statistic F(1,9)                                                    | 0.00024 <sub>4</sub> | 0.502    | 0.615    | 1.41     | 3.97     | 0.417    | 0.00699  | 0.0527               | 0.343    | 0.316    | 1.31    | 2.60                 | 0.27    |
| p-value                                                               | 0.988                | 0.496    | 0.453    | 0.265    | 0.0776   | 0.535    | 0.936    | 0.827                | 0.617    | 0.674    | 0.282   | 0.141                | 0.616   |
| Effect Size                                                           | 1.68E-05             | 0.0212   | 0.0538   | 0.118    | 0.283    | 0.0271   | 0.000670 | 0.00508              | 0.0237   | 0.178    | 0.0694  | 0.200                | 0.0118  |
| Interaction                                                           |                      |          |          |          |          |          |          |                      |          |          |         |                      |         |

|                                          |         |         |        |         |         |         |         |         |        |        |         |         |        |
|------------------------------------------|---------|---------|--------|---------|---------|---------|---------|---------|--------|--------|---------|---------|--------|
| F-statistic<br>F(1,9)                    | 0.0623  | 0.0214  | 0.962  | 0.243   | 0.145   | 0.115   | 0.041   | 0.0477  | 0.359  | 10.2   | 0.154   | 0.208   | 0.115  |
| p-value                                  | 0.808   | 0.887   | 0.352  | 0.634   | 0.712   | 0.743   | 0.845   | 0.836   | 0.61   | 0.193  | 0.704   | 0.659   | 0.742  |
| Effect Size                              | 0.00248 | 0.00069 | 0.015  | 0.00348 | 0.00119 | 0.00487 | 0.00184 | 0.00457 | 0.110  | 0.121  | 0.00744 | 0.00192 | 0.0075 |
| <b>One-Way ANOVA: Social Targets</b>     |         |         |        |         |         |         |         |         |        |        |         |         |        |
| Fixation Order                           | 1       | 2       | 3      | 4       | 5       | 6       | 7       | 8       | 9      | 10     | All     | Early   | Late   |
| F-statistic<br>F(3,31)                   | 0.8863  | 2.0504  | 1.4601 | 1.5952  | 1.7811  | 0.3717  | 2.0223  | 1.2824  | 5.5773 | 0.2578 | 3.1216  | 2.184   | 2.4871 |
| p-value                                  | 0.459   | 0.1272  | 0.2445 | 0.2105  | 0.1713  | 0.774   | 0.1345  | 0.303   | 0.0069 | 0.8543 | 0.0400  | 0.1098  | 0.0789 |
| Effect Size                              | 0.079   | 0.1656  | 0.1238 | 0.1337  | 0.147   | 0.0347  | 0.1835  | 0.1382  | 0.4817 | 0.0606 | 0.232   | 0.1745  | 0.194  |
| <b>One-Way ANOVA: Non-social Targets</b> |         |         |        |         |         |         |         |         |        |        |         |         |        |
| Fixation Order                           | 1       | 2       | 3      | 4       | 5       | 6       | 7       | 8       | 9      | 10     | All     | Early   | Late   |
| F-statistic<br>F(3,31)                   | 0.0296  | 1.6797  | 1.2487 | 0.6742  | 3.7904  | 0.4411  | 0.0451  | 0.8797  | 3.8646 | 0.8791 | 2.2979  | 2.4435  | 1.166  |
| p-value                                  | 0.993   | 0.1917  | 0.309  | 0.5744  | 0.0200  | 0.7253  | 0.987   | 0.4661  | 0.0332 | 0.4449 | 0.097   | 0.0827  | 0.339  |
| Effect Size                              | 0.0029  | 0.1398  | 0.1078 | 0.0613  | 0.2684  | 0.0422  | 0.0056  | 0.1029  | 0.453  | 0.1495 | 0.1819  | 0.1912  | 0.1044 |

## Supplemental Figure Legends

**Supplemental Fig. 1.** MRI anatomical scans of the amygdala lesions. Displayed are high-resolution (0.5-1 mm isotropic) horizontal T1-weighted magnetic resonance imaging sections of the anterior medial temporal lobes with red arrows indexing the focal bilateral amygdala calcification damage. R: right.

**Supplemental Fig. 2.** Low-level properties of the stimuli. **(A-C)** Standard arrays used in Experiment 2. **(D-F)** Simpler arrays used in Experiment 3. **(A,D)** Standard low-level saliency measured with the Itti-Koch model (Itti et al., 1998, Itti and Koch, 2001) did not differ between social and non-social items in the search array (two-tailed t-test,  $p=0.98$  for standard arrays and  $p=0.46$  for simpler arrays). The sum of saliency of all items was normalized to 1 within each search array. **(B,E)** Distance to center did not differ between social and non-social items (measured in pixel,  $p=0.85$  for standard arrays and  $p=0.96$  for simpler arrays). **(C,F)** Item size did not differ between social and non-social items (measured in pixel<sup>2</sup>,  $p=0.79$  for standard arrays and  $p=0.34$  for simpler arrays).

**Supplemental Fig. 3.** Target-relevant effect in Experiment 1 was preserved after normalization of fixation percentage. People with ASD had reduced percentage of fixations on items, for both **(A)** social targets and **(B)** non-social targets. However, people with ASD still had reduced fixations towards social items when searching for social targets **(C)**, but they were not different from controls when searching for non-social targets **(D)**.

**Supplemental Fig. 4.** In Experiment 2, all subjects looked at target-congruent items in a fast and sustained manner. **(A-B)** People with ASD. **(C-D)** ASD controls. **(E-F)** NUS controls. Red: social items. Blue: non-social items. Upper row **(A,C,E)**: when searching

for social targets. Lower row (**B,D,F**): when searching for non-social targets. Asterisk indicates significant difference between target-congruent items and target-incongruent items (two-tailed paired t-test:  $p < 0.05$ ). Shaded area denotes  $\pm$ SEM.

**Supplemental Fig. 5.** In Experiment 3, all subjects looked at target-congruent items in a fast and sustained manner. (**A-B**) Amygdala lesion patients. (**C-D**) People with ASD. (**E-F**) ASD controls. (**G-H**) NUS controls. Red: social items. Blue: non-social items. Upper row (**A,C,E,G**): when searching for social targets. Lower row (**B,D,F,H**): when searching for non-social targets. Asterisk indicates significant difference between target-congruent items and target-incongruent items (two-tailed paired t-test:  $p < 0.05$ ). Shaded area denotes  $\pm$ SEM.

## References

- Itti L, Koch C (2001) Computational modelling of visual attention. *Nat Rev Neurosci* 2:194-203.
- Itti L, Koch C, Niebur E (1998) A Model of Saliency-Based Visual Attention for Rapid Scene Analysis. *IEEE Trans Pattern Anal Mach Intell* 20:1254-1259.
- Rutishauser U, Koch C (2007) Probabilistic modeling of eye movement data during conjunction search via feature-based attention. *Journal of Vision* 7.
- Treisman A (1988) Features and Objects: The Fourteenth Bartlett Memorial Lecture. *The Quarterly Journal of Experimental Psychology Section A* 40:201-237.
- Treisman A (1998) Feature binding, attention and object perception. *Philosophical Transactions of the Royal Society of London Series B: Biological Sciences* 353:1295-1306.
- Wolfe JM (1998) What Can 1 Million Trials Tell Us About Visual Search? *Psychological Science* 9:33-39.
